# Supplementary material for: Identification of Distant Regulatory Elements Using Expression Quantitative Trait Loci Mapping for Heat-Responsive Genes in Oysters
Source: Genes (Basel). 2021 Jul 5;12(7):1040. doi: 10.3390/genes12071040 (PMC8303352; doi:10.3390/genes12071040)
Supplement: Supplementary file 1 [file genes-12-01040-s001.zip]

Archive with 5 entries (5 files):
- Figure S1.pdf
- Figure S2.pdf
- Figure S3.svg
- Figure S4.pdf
- supplementary Table.xlsx
