# Supplementary material for: Identification of Distant Regulatory Elements Using Expression Quantitative Trait Loci Mapping for Heat-Responsive Genes in Oysters
Source: Genes (Basel). 2021 Jul 5;12(7):1040. doi: 10.3390/genes12071040 (PMC8303352; doi:10.3390/genes12071040)
Supplement: Supplementary file 1 [file genes-12-01040-s001.zip › supplementary Table.xlsx]

## Sheet: Table S1
Table S1	Peripheral amplification primers and unidirectional oligonucleotide primers of SNPs
Marker Name	Outer primers	unidirectional oligonucleotide primers
Marker13973	F:TACATTAACTGTAAATTAATTCAACTTT	TTTTTTTTTTTTTTTTTTTTTTTTTTTTTTTTTTTATGCAGTACATTTCATCATTTG
	R:TCTTAAAAAAGTAGAGAAAAATATGAA
Marker20478	F:CTTACGCTTTACAAATACGCAGG	TTTTTTTTTTTTTTTTTTTTTTTTTTTTCATGAGCCCTGTCCACC
	R:TACAACCATCACACCTCACCG
Marker28123	F:GTCTTTCCTCTGCTACCTCATCC	TTTTTTTTTTTTTTTTTTTTGACTTCTCCGAAGCTCTCCT
	R:GTTTGAGCAGGCATGATAGGTG
Marker35461	F:TGTGAATATGACACCGGGAGAT	TTTTTTTTTTTTTTTTTTTTTTTTTTTTTTTTTTTTTTTTTTTTTAAAGAGGACACAAAGAAGCA
	R:TTCCCCTTTCAATGTGACTGG
Marker14346-48	F:GATGTAATTTCGTAGATGCGTCG	TTAGATCTCAATTTATAAGTTCTACTGGTA
	R:AACCCCCTCCTCCCTCCTA
Marker14346-85	F:GATGTAATTTCGTAGATGCGTCG	TTTTTTTTTTTGTATACAGGTAATACAATGTAGTTGTT
	R:AACCCCCTCCTCCCTCCTA

## Sheet: Table S2
Table S2	Gene expression level of 21 heat-responsive genes in 106 individuals.
Number of individuals	HSP68	DJB13	HSPA13	HSPB1	PARP4	HYOU1	HSPA9	HSP68	HSPA12B-22078	HSPA12A	HSPA12B-12492	SIP1	HSPA4	HSPA5-08834	HSPA5-15492	ATG7	BRKS2	CLCN2	GAK	MTMR8	RNF123
2	0.141515	0.0163096	0.00211959	0.255733	0.00135708	0.00819747	0.0202099	0.693166	0.00201495	0.0038623	0.00334926	0.12704	0.0646368	0.127404	0.0751389	1.00022	1	1.01328	1.00008	1.04234	1.01174
7	0.0485205	0.0587388	0.00272687	0.179961	0.0150144	0.00918332	0.0225391	0.0904345	0.00372369	0.00563773	0.00569695	0.109474	0.0582593	0.0944043	0.0476852	4.50761	3.25851	0.311928	0.308499	1.41086	0.902757
8	0.0539479	0.0229804	0.00351386	0.255716	0.012878	0.0111446	0.0229983	0.182137	0.0029969	0.00535637	0.00558728	0.0896199	0.0685899	0.181933	0.0900377	7.76911	15.4885	0.854372	1.13756	4.06502	1.17612
9	0.0303913	0.0657217	0.00379824	0.247436	0.00793272	0.0101474	0.0176375	0.0256764	0.00318842	0.00592966	0.00553613	0.0233188	0.0648871	0.193265	0.064943	3.08344	4.10083	0.229266	0.322249	1.00683	0.906896
12	0.0218663	0.0408787	0.00154079	0.269291	0.00547633	0.00425874	0.0121298	0.0424209	0.00284235	0.0033978	0.00261895	0.0409591	0.0409832	0.0839006	0.0422148	4.71721	4.04919	0.728384	0.872678	1.64234	0.668469
13	0.0155918	0.0173659	0.00196041	0.126048	0.0108109	0.0081201	0.015594	0.0400108	0.00198597	0.0031521	0.00216818	0.0355672	0.0500304	0.142545	0.0739031	0.846276	4.41479	0.341437	0.399398	1.3103	1.27627
14	0.0328209	0.0591613	0.00195561	0.235559	0.00372441	0.00774216	0.0157312	0.237226	0.00330654	0.00366813	0.00386913	0.117329	0.0359284	0.232229	0.0761394	4.05165	6.5468	0.65067	0.960879	2.60018	0.878468
15	0.0242911	0.0230239	0.00157542	0.161125	0.00415166	0.00620399	0.0116893	0.0248407	0.00243366	0.00327669	0.00338973	0.0246933	0.024243	0.111749	0.0481339	0.201125	3.32109	0.167047	0.141666	0.843356	0.897177
16	0.0388318	0.0204282	0.00301079	0.277366	0.00500611	0.0100431	0.0198901	0.213658	0.00382295	0.00482882	0.00512905	0.0783495	0.0393621	0.155937	0.0797204	NA	NA	NA	NA	NA	NA
17	0.0436079	0.0183727	0.00391503	0.246338	0.00670861	0.0107453	0.0231103	0.0340964	0.00458504	0.0075505	0.0102966	0.043172	0.0404682	0.15595	0.0730986	2.48144	4.66791	0.228543	0.188787	0.535478	1.22113
19	0.033837	0.0264163	0.00164367	0.413197	0.0064868	0.00578297	0.0126184	0.109973	0.00342983	0.00340853	0.00521259	0.0724878	0.0526244	0.103782	0.0528815	1.59657	7.57686	0.360582	0.236541	1.35287	1.32572
21	0.0595846	0.0754938	0.00460917	0.565923	0.0104999	0.0309316	0.032747	0.0815556	0.00455549	0.00433527	0.00775518	0.123158	0.145377	0.540781	0.238949	1.75246	2.94403	0.311255	0.06085	1.7005	1.29588
22	0.0141717	0.0141626	0.00180726	0.143191	0.00354939	0.00596021	0.00874691	0.0279471	0.00237926	0.00359207	0.00328256	0.0142651	0.0278417	0.0790894	0.044576	1.72024	5.36193	0.348583	0.326701	2.52797	1.79441
23	0.0242569	0.0336567	0.00285536	0.25078	0.0108918	0.00803579	0.0156316	0.0636964	0.00334177	0.00576786	0.00623545	0.0411926	0.0401197	0.12404	0.0632559	4.14143	6.58221	0.384676	0.254506	0.713408	1.03731
25	0.0292432	0.0301086	0.00269051	0.221242	0.00513608	0.0107948	0.0170126	0.0885412	0.00282817	0.00474238	0.00281862	0.0856545	0.0434906	0.166974	0.0840987	2.05035	8.40465	1.4201	0.561196	2.39174	1.68773
26	0.0305799	0.029851	0.0021672	0.254063	0.00870598	0.0110906	0.015528	0.0671508	0.00391671	0.00766017	0.00389481	0.0993508	0.0463042	0.254393	0.118297	2.90179	2.35931	1.14872	0.761546	2.26106	1.00686
27	0.0316544	0.0277753	0.0025559	0.244431	0.00388634	0.00778475	0.0150546	0.12454	0.00394837	0.00495447	0.00398888	0.0769829	0.0512117	0.133345	0.0755079	3.7415	1.49342	0.61526	0.274926	0.679666	0.421636
29	0.0383605	0.0326005	0.00386406	0.31858	0.00757453	0.010038	0.0313466	0.146866	0.00442534	0.00717831	0.00797778	0.0603085	0.0617049	0.245708	0.0987706	3.18038	0.995631	0.482611	0.227802	3.81148	0.405037
30	0.0316138	0.0183202	0.00203546	0.250144	0.00800823	0.0063212	0.00820084	0.126529	0.00210822	0.00397741	0.00205231	0.0636459	0.0484159	0.1268	0.0406459	1.4397	2.0141	0.324784	0.286786	1.57324	0.956705
31	0.0172441	0.026799	0.00330862	0.21507	0.00635996	0.00664198	0.0138429	0.0188778	0.0034433	0.00532208	0.00370332	0.0144866	0.0525077	0.194217	0.0580239	NA	NA	NA	NA	NA	NA
33	0.0244935	0.0229203	0.00157767	0.16672	0.00802116	0.0051999	0.0158713	0.0160615	0.0019986	0.00399995	0.00279254	0.0164841	0.0322239	0.0827823	0.0403257	NA	NA	NA	NA	NA	NA
34	0.0287551	0.0304561	0.00208663	0.233578	0.00439157	0.00752468	0.0192435	0.100879	0.00225599	0.00430134	0.00364411	0.048823	0.0351382	0.116232	0.0576853	NA	NA	NA	NA	NA	NA
35	0.0309509	0.0657643	0.00416076	0.249401	0.00778711	0.0104506	0.0294614	0.0634423	0.00420408	0.00582822	0.00779575	0.0774548	0.0617162	0.249934	0.084522	NA	NA	NA	NA	NA	NA
36	0.0275756	0.055048	0.00685123	0.290821	0.0167343	0.0133662	0.0301711	0.077883	0.00338364	0.0067632	0.00782655	0.0527428	0.0869127	0.301288	0.108457	1.7383	3.86098	0.587707	0.636308	2.59833	0.624642
38	0.0275934	0.0261104	0.00159829	0.196698	0.00289283	0.00605919	0.00790981	0.106217	0.00333282	0.00345822	0.00235768	0.0771577	0.0470967	0.099478	0.193685	NA	NA	NA	NA	NA	NA
39	0.0350871	0.0230226	0.00177132	0.214518	0.0105595	0.00924617	0.00967744	0.0393068	0.00256311	0.00452249	0.00462994	0.036962	0.0413773	0.145598	0.0757194	1.13561	2.95459	0.281211	0.193171	2.23627	2.13811
40	0.0316724	0.0170674	0.00209725	0.236943	0.00423434	0.00784987	0.0161091	0.0637831	0.00103355	0.00410672	0.00249077	0.0320959	0.0544635	0.188706	0.0626281	0.610515	1.89371	0.245378	0.193674	2.15224	0.937561
41	0.0381304	0.0168725	0.00289555	0.25735	0.00818871	0.00992817	0.0202794	0.0846437	0.00202124	0.005125	0.00422398	0.0362197	0.065307	0.250791	0.088547	0.835585	2.31943	0.594065	0.468518	1.57017	0.66752
42	0.0196073	0.0307763	0.00174499	0.199769	0.000515717	0.00455614	0.00792797	0.0348172	0.0017778	0.00354781	0.00303496	0.01689	0.0282129	0.0594445	0.0281531	0.927044	1.82772	0.157099	0.109398	1.32639	0.653722
43	0.0158242	0.0330263	0.00246969	0.243431	0.000524766	0.00415334	0.00824701	0.0161006	0.00255701	0.0040514	0.00378897	0.0153628	0.0313557	0.063286	0.0331722	0.895885	4.3551	0.291355	0.564166	1.18651	0.278551
46	0.0236735	0.0389486	0.00236938	0.168402	0.00941742	0.00947913	0.0384356	0.0402025	0.00198751	0.0023962	0.00233427	0.0421674	0.0382268	0.101335	0.0425533	1.3075	3.80791	0.382292	0.463113	1.21152	0.167405
47	0.0323938	0.0331669	0.00225089	0.257681	0.000913587	0.0057434	0.0175691	0.0922542	0.0044838	0.00498734	0.00538818	0.0614791	0.0332985	0.127143	0.0512356	0.610952	0.464505	0.092616	0.143097	1.01723	0.275057
50	0.0259379	0.0146359	0.00223146	0.115321	0.0048209	0.0059763	0.0105491	0.0647774	0.00197149	0.00460242	0.0019557	0.0300664	0.0351165	0.116745	0.0512314	2.5961	3.49967	0.352575	0.461885	3.62419	0.229466
53	0.0175504	0.0158709	0.00177255	0.126201	0.00765901	0.0038378	0.0079337	0.0601104	0.00197509	0.00390317	0.00193403	0.031311	0.030368	0.120749	0.0410517	3.36009	1.80508	0.24164	0.181874	0.625715	0.291944
54	0.0395042	0.024482	0.00242465	0.254618	0.00543137	0.00982044	0.01969	0.164241	0.00380513	0.00512561	0.00512979	0.0997979	0.0398648	0.166019	0.0804352	2.80814	4.03434	0.13412	0.0455937	0.334153	0.317776
55	0.0341996	0.0320356	0.00536889	0.247736	0.0037135	0.00620683	0.0155085	0.0662899	0.00388001	0.00492349	0.00760311	0.0309085	0.0336611	0.123058	0.0431101	9.87212	2.69313	0.712968	0.277554	2.3181	0.30694
56	0.0208572	0.0323511	0.00363393	0.232201	0.003721	0.00398055	0.0136972	0.0624702	0.00367711	0.0038055	0.00570093	0.0375685	0.0405386	0.156096	0.0646312	1.3307	2.9679	0.320237	0.164661	0.758375	0.695601
60	0.0302012	0.0273958	0.00451999	0.245001	0.00704409	0.00722003	0.0246982	0.0859584	0.00450397	0.00368429	0.00705367	0.0563831	0.0551587	0.216087	0.10497	1.55627	3.76819	0.22419	0.159659	0.827888	0.391124
61	0.0121118	0.0299616	0.00208792	0.119582	0.000818508	0.0032733	0.00623698	0.0152937	0.00479275	0.00484593	0.00405824	0.0126799	0.0292231	0.0983513	0.0337736	5.61381	5.70082	0.71499	0.674359	1.38246	1.11161
63	0.0340735	0.127136	0.00383356	0.247955	0.00979729	0.00785976	0.0155133	0.0623035	0.00832049	0.00796491	0.00790907	0.121797	0.0612633	0.159522	0.0613657	1.10605	1.70951	0.32298	0.13399	1.04181	1.02451
64	0.0306981	0.0617859	0.00194984	0.243425	0.00362772	0.00406702	0.0154131	0.124881	0.00205583	0.00432483	0.00397617	0.122803	0.0608606	0.164496	0.060915	5.67213	4.83229	0.249044	0.10476	0.915352	0.54753
65	0.0337716	0.0471576	0.00342003	0.197378	0.00466306	0.00749582	0.0224498	0.0510854	0.00168261	0.00682879	0.0044472	0.0276467	0.0635829	0.18372	0.0875257	1.57269	3.55635	0.16646	0.0711544	0.756216	0.357791
67	0.0268377	0.123188	0.0250946	0.419956	0.0463029	0.0262651	0.0258871	0.053394	0.0255268	0.0262511	0.0250987	0.0533435	0.0520117	0.148246	0.0532786	1.43243	2.29341	0.248051	0.198839	0.791336	0.427061
69	0.154443	0.0303157	0.0456797	0.854132	0.0160803	0.0368016	0.0709979	0.606241	0.0385686	0.0412769	0.0791881	0.286853	0.0628532	0.232816	0.0763078	1.46173	2.54832	0.29924	0.258649	1.73266	0.431277
70	0.0303266	0.0314263	0.00230937	0.280902	0.00683555	0.00753126	0.014953	0.119357	0.00193419	0.00386735	0.00387869	0.0610319	0.0505674	0.211972	0.0608442	3.29246	3.07333	0.302657	0.172485	0.666543	0.330242
75	0.0304345	0.0286406	0.00325809	0.228317	0.00812288	0.0111557	0.0143761	0.0475603	0.0021069	0.00366948	0.00473735	0.0377204	0.0562055	0.220302	0.0682412	4.30237	2.46526	0.542364	0.313803	1.27717	0.298313
76	0.0204579	0.0130095	0.00158283	0.147316	0.00336162	0.00619084	0.0134567	0.0172298	0.0015686	0.00313264	0.00188107	0.0287323	0.0244239	0.100451	0.0487655	8.22536	10.1381	0.796554	0.4516	6.18726	0.549922
77	0.0283696	0.0296803	0.00196998	0.233006	0.000652466	0.00896464	0.0140991	0.0147026	0.00208126	0.00383322	0.00366886	0.0297907	0.0307632	0.12155	0.0684279	3.37011	3.77814	0.30848	0.165741	2.85885	0.358321
79	0.0519222	0.0451686	0.00676749	0.213272	0.0125728	0.0140742	0.0180121	0.0552851	0.00682219	0.00704572	0.00666811	0.0528702	0.0902124	0.214117	0.106111	6.90934	10.0617	0.865317	0.322812	1.88888	0.322291
81	0.0409132	0.0319922	0.00547023	0.271334	0.00198111	0.00964804	0.0270025	0.0584833	0.0051208	0.00789865	0.00623869	0.0429703	0.103076	0.160947	0.0915014	NA	NA	NA	NA	NA	NA
82	0.0328761	0.0643744	0.00288063	0.249875	0.00384914	0.00456786	0.00830306	0.250659	0.00378831	0.00391733	0.0038569	0.124005	0.038195	0.128977	0.251325	0.834639	1.51354	0.359837	0.233646	0.373933	0.581137
83	0.0136639	0.0221911	0.00189382	0.106319	0.00651691	0.00362992	0.00988508	0.0255656	0.00174294	0.00328533	0.00331695	0.0196355	0.0268663	0.105696	0.0519839	2.09994	6.35955	0.144433	0.142436	0.521023	0.498579
85	0.0320196	0.0314416	0.00487258	0.151403	0.00427179	0.00927086	0.0164635	0.0171757	0.00244792	0.00450991	0.005551	0.0156329	0.0573527	0.125294	0.0627195	1.20935	4.00377	0.37176	0.393789	0.45759	0.167718
87	0.0335767	0.0315536	0.00356642	0.194152	0.00496086	0.00617764	0.0131802	0.0515324	0.00312643	0.00623926	0.00584364	0.0242832	0.0500774	0.114857	0.0538955	2.79143	2.46168	0.56027	0.477696	0.524484	0.531432
88	0.0732536	0.020299	0.00128396	0.393723	0.00343456	0.00552158	0.0122037	0.300838	0.00225022	0.00369511	0.00244341	0.158575	0.0657917	0.157925	0.0779681	4.26853	3.45274	0.605987	0.568305	1.08438	0.591593
89	0.0164235	0.031072	0.00352042	0.227851	0.00723824	0.0071043	0.0143775	0.0246352	0.00343725	0.00714863	0.00548789	0.0283513	0.0574139	0.225508	0.0880518	2.5404	2.59826	0.157421	0.150551	0.518621	0.532007
91	0.0262665	0.0257575	0.00181685	0.172396	0.00702822	0.012783	0.0131268	0.0260935	0.00167097	0.00332761	0.00317119	0.0332567	0.0272495	0.148423	0.0754293	2.03107	3.86149	0.228077	0.239118	1.01256	0.621039
92	0.0903345	0.0307939	0.00400319	0.474573	0.00775396	0.0157012	0.0314325	0.0841527	0.00208242	0.00566635	0.00777541	0.0632302	0.062675	0.246512	0.122628	4.98678	3.90756	0.43399	0.384091	0.350097	0.572432
93	0.038332	0.0195237	0.00245149	0.153146	0.00250928	0.00497718	0.00988004	0.078293	0.00280781	0.00251947	0.00308498	0.0388065	0.0386538	0.0779225	0.0387431	2.37746	3.08169	0.477392	0.260331	1.27418	0.460109
94	0.0261033	0.0171708	0.0031211	0.191962	0.00803	0.00810328	0.0151197	0.0449772	0.00383547	0.00395404	0.00404368	0.036194	0.0574799	0.122483	0.0722085	5.317	3.47296	1.47844	0.65575	0.938751	0.620398
96	0.0273819	0.0135049	0.00286926	0.162545	0.00349534	0.0134334	0.0138478	0.0409226	0.00185067	0.0033603	0.00218048	0.0281231	0.0281115	0.124208	0.0553465	NA	NA	NA	NA	NA	NA
97	0.0613363	0.0227954	0.00186843	0.479274	0.00393287	0.00861968	0.0209795	0.476271	0.0018755	0.00542618	0.00368022	0.247606	0.0606051	0.120222	0.0647284	7.32795	3.12026	1.03434	0.474924	1.75288	0.425652
98	0.0691578	0.0234666	0.00271813	0.342356	0.00549531	0.0108305	0.0206532	0.348815	0.00345937	0.0055924	0.00346772	0.180479	0.0552535	0.17739	0.0856054	4.22028	2.7862	0.703005	0.236709	0.196301	0.609309
99	0.425494	0.125035	0.00198337	2.67716	0.00101709	0.0372588	0.126384	2.49206	0.00348279	0.00565876	0.00385535	3.65588	0.48363	0.700786	0.336221	5.0831	2.04804	0.269126	0.131473	0.45862	0.534663
100	0.0559084	0.0197708	0.00209339	0.347873	0.00551198	0.00872819	0.0160831	0.254198	0.00234453	0.00402563	0.00390799	0.1253	0.0314614	0.200151	0.0622791	3.01889	3.1449	0.303164	0.135185	0.562065	1.04795
101	0.0197863	0.0394801	0.00246952	0.155214	0.000620187	0.00482352	0.0118986	0.020882	0.00260682	0.0048769	0.00587239	0.0190518	0.0212817	0.153323	0.0393079	2.90301	4.07563	0.518114	0.286886	2.20188	0.979827
102	0.235506	0.0308934	0.0040924	0.494133	0.00843489	0.00809618	0.0178774	1.31574	0.00371981	0.0054408	0.00443146	0.490801	0.0621487	0.245195	0.125767	6.4857	4.24964	0.98529	0.302365	0.85364	0.525729
104	0.0525379	0.0133628	0.00177914	0.226707	0.00346136	0.00494877	0.0133577	0.214414	0.00312268	0.00316923	0.00326949	0.116759	0.0308885	0.113771	0.052039	2.47178	3.34935	0.565937	0.110543	1.38262	0.454896
106	0.0157674	0.0316287	0.0019618	0.249244	0.00915921	0.0748542	0.00800537	0.0652486	0.00310122	0.00392944	0.00306682	0.0316202	0.0217384	0.0842425	0.045479	1.24958	0.53645	0.451737	0.158722	0.61877	0.345929
108	0.0155073	0.0317772	0.00276656	0.227874	0.00734963	0.125678	0.00742816	0.231668	0.00363203	0.00467489	0.00358612	0.0576942	0.0285727	0.114856	0.0576524	2.72263	1.60255	0.348432	0.470278	0.565855	0.184285
109	0.0511283	0.0273234	0.00395402	0.247496	0.0156351	0.0082478	0.0157206	0.0634724	0.00410384	0.00416704	0.00790818	0.0625024	0.0316179	0.251173	0.0717533	3.53013	1.90041	0.352243	0.479661	1.64133	0.989183
110	0.122304	0.0630669	0.00210667	0.478878	0.00401598	0.00409959	0.0156133	0.452456	0.00128255	0.00211366	0.00292472	0.583636	0.0624362	0.219179	0.0608259	1.77581	4.79319	0.268728	0.221193	1.12569	0.250291
112	0.0279194	0.0192529	0.00168096	0.216507	0.00841308	0.0113058	0.0134905	0.027044	0.00313689	0.00700096	0.00402277	0.0190434	0.0548779	0.147809	0.0780759	2.442	2.17322	0.567344	0.363047	1.03585	0.393315
113	0.034618	0.0158084	0.00231364	0.199439	0.00168251	0.00966172	0.0170399	0.119625	0.00340382	0.00763141	0.00423789	0.0624293	0.0327285	0.123355	0.0610052	NA	NA	NA	NA	NA	NA
114	0.0177705	0.0298471	0.00244397	0.142549	0.00449382	0.00464563	0.00892113	0.0373287	0.00208103	0.002555	0.00336613	0.0361839	0.0361836	0.0723578	0.0359519	2.72003	1.84438	0.779963	0.769767	1.32747	0.355567
115	0.0492869	0.033877	0.00218553	0.328037	0.00496221	0.00437841	0.0132363	0.126356	0.00278752	0.00421446	0.00412361	0.104287	0.0498579	0.0792844	0.0366595	4.12431	3.55052	0.388103	0.437933	2.30699	0.671538
116	0.0988621	0.0221126	0.00281925	0.698248	0.00565652	0.0112528	0.0447425	0.877866	0.00329634	0.00522571	0.00279709	0.725095	0.173316	0.200378	0.0923395	0.645795	3.51765	0.076151	0.0851215	0.714112	0.355149
117	0.0293809	0.0305566	0.00528436	0.332801	0.00970391	0.00889205	0.0273349	0.0596752	0.00371917	0.00738848	0.00796696	0.0688335	0.0796666	0.114245	0.0572625	5.49623	7.26954	0.682621	0.634953	2.00307	1.19342
118	0.454929	0.0292533	0.00217396	2.22245	0.00434456	0.00938517	0.0714532	3.64786	0.00257105	0.00351757	0.00358426	3.63266	0.457283	0.462926	0.225836	1.80741	12.6019	0.234421	0.309736	0.844701	1.20806
120	0.0222002	0.0449528	0.00200121	0.255733	0.00315523	0.00793095	0.0152519	0.0309938	0.00378153	0.00492433	0.00392575	0.0347274	0.0724879	0.147703	0.0790267	3.71008	4.05794	0.336131	0.517306	3.42246	0.407368
122	0.0339019	0.0299167	0.00210873	0.255313	0.00823566	0.00563166	0.0103108	0.0641573	0.00206926	0.00408938	0.00389409	0.0659634	0.0604828	0.0635777	0.0315636	7.0017	3.01265	0.846629	1.04013	4.49254	0.468631
124	0.0307282	0.029968	0.00233215	0.241853	0.00762719	0.00746881	0.0152353	0.0360251	0.00306062	0.00511122	0.00469568	0.0412796	0.0603136	0.164188	0.0740397	4.2297	4.49497	0.263745	0.384993	1.32361	0.658167
126	0.0243592	0.0349203	0.00209759	0.194061	0.00306097	0.00789168	0.0121186	0.0337091	0.0017216	0.00310747	0.00198063	0.0371113	0.0473896	0.129098	0.0478945	4.64715	2.49289	0.307777	0.436915	1.98675	0.375355
127	0.0477967	0.03142	0.00200373	0.353219	0.00407874	0.00802224	0.0163341	0.0630325	0.00333596	0.00399732	0.00424786	0.0620213	0.0629044	0.123902	0.0626498	1.96764	1.68225	0.295967	0.161525	1.17131	0.390792
128	0.037383	0.0245674	0.00148616	0.183441	0.00434111	0.0081789	0.0161514	0.0481718	0.00242275	0.00437534	0.00491418	0.0273869	0.0314506	0.128503	0.0628621	0.842828	3.24878	0.142209	0.0916889	0.653673	0.407111
129	0.0297737	0.0352661	0.0019457	0.198993	0.00769052	0.00727631	0.015132	0.0151221	0.00404357	0.00719809	0.0076492	0.0152085	0.0324442	0.120086	0.060797	6.08802	4.72012	0.262403	0.135782	1.63548	0.537165
130	0.0233066	0.0355194	0.0023308	0.269987	0.0117332	0.00557607	0.0119322	0.0474856	0.00298925	0.00484052	0.00405189	0.0488614	0.0458235	0.095355	0.0533629	0.596237	5.72816	0.149905	0.148002	0.921474	0.399736
132	0.0411082	0.0316522	0.0037351	0.245757	0.00474342	0.0147783	0.0184912	0.132007	0.0021039	0.00403613	0.00319742	0.122222	0.0606623	0.262456	0.119699	1.39161	3.28461	0.271264	0.221032	1.32795	0.88267
133	0.0710067	0.0595335	0.00194557	0.294433	0.000868837	0.00439856	0.0149914	0.0597564	0.00201537	0.0038455	0.00736967	0.0592023	0.046531	0.133067	0.0591675	2.59638	1.92442	0.346455	0.281295	1.49086	0.599613
134	0.030942	0.0439472	0.0019221	0.247666	0.00649641	0.00791702	0.0154032	0.130821	0.00219485	0.00395818	0.00608871	0.12925	0.0651525	0.246009	0.0979499	6.57733	7.80949	0.378157	0.260141	1.94409	0.349324
135	0.031492	0.0612439	0.00446237	0.276937	0.00934588	0.00777332	0.0307703	0.0637039	0.00428202	0.00782717	0.00796495	0.0623707	0.063923	0.249433	0.0657787	6.56009	2.57743	0.449211	0.254001	1.68269	0.785051
136	0.0261814	0.0311197	0.00281979	0.360837	0.00628894	0.00369548	0.0161889	0.055355	0.0028502	0.00410363	0.00315934	0.0656398	0.0441681	0.108569	0.0442096	3.37121	1.44037	0.637204	0.804555	2.59063	0.810647
137	0.0753932	0.0476271	0.00754103	0.264297	0.00389276	0.0103956	0.0147844	0.0645989	0.00369264	0.00734755	0.00725525	0.0587123	0.0598818	0.24032	0.115013	NA	NA	NA	NA	NA	NA
184	0.126068	0.0312768	0.0040663	0.227883	0.00841499	0.0144911	0.0172743	0.524573	0.00297214	0.00568773	0.00352578	0.241159	0.0788543	0.27313	0.142287	2.98092	1.46473	0.207093	0.286508	1.92226	0.17135
186	0.165018	0.0183015	0.00263521	0.562747	0.00394293	0.00759615	0.0152599	1.06288	0.00209676	0.00394658	0.00380983	0.24442	0.0802115	0.242855	0.121706	3.87014	3.00002	0.447375	0.750035	2.31001	0.758167
188	0.0330061	0.0174886	0.00194431	0.268704	0.0040609	0.00607384	0.0114382	0.0619233	0.00316964	0.00466813	0.00418469	0.0448901	0.0326954	0.142416	0.0745626	4.57826	2.25614	0.839951	0.474722	1.86482	0.604964
189	0.10283	NA	0.00251738	0.351023	0.00320041	0.0107569	0.0199735	0.33032	0.00259986	0.00513029	0.00371168	0.118106	0.0618508	0.160552	0.081065	5.58724	3.76336	1.13472	1.00048	2.26933	1.12903
190	0.0632622	NA	0.00112645	0.247293	0.00197547	0.00416058	0.0112221	0.510923	0.00117895	0.00237277	0.00170825	0.122836	0.0322935	0.0765929	0.044643	0.977493	1.67838	0.412673	0.427608	3.33637	0.456187
191	0.0628656	NA	0.00568086	0.530313	0.0010573	0.00806747	0.0156619	0.0651897	0.00736518	0.0081908	0.007928	0.0320293	0.0679572	0.23537	0.0620928	1.18049	2.3537	0.185502	0.133401	0.459762	0.221553
192	0.0322114	NA	0.00374422	0.248445	0.00536409	0.0098576	0.0155802	0.0423416	0.00462625	0.00611547	0.0054631	0.0306493	0.0630376	0.24497	0.0615627	2.13684	3.49685	0.581641	0.833056	1.01604	0.537412
194	0.331997	NA	0.00609833	1.094	0.00790622	0.0149213	0.0517015	1.92797	0.00392029	0.00442546	0.00393865	1.42041	0.240047	0.48998	0.247311	0.451703	3.45937	0.208372	0.121445	0.566853	1.30916
195	0.0590739	NA	0.00721222	0.240673	0.00427466	0.0148671	0.0301209	0.0751135	0.00728929	0.00741835	0.00878548	0.0596515	0.0724567	0.290104	0.119643	NA	NA	NA	NA	NA	NA
196	0.108118	NA	0.00382575	0.438935	0.00676595	0.0149132	0.0281303	0.217639	0.00555761	0.00719639	0.00747299	0.113755	0.118727	0.22837	0.110246	1.20002	1.60127	0.248056	0.287714	0.951574	0.627297
198	0.0286445	NA	0.00369012	0.339067	0.000979891	0.00829932	0.0132536	0.0355328	0.00392507	0.00625882	0.00410381	0.0185266	0.0616264	0.200229	0.078593	8.91761	3.71993	0.432508	0.662755	1.91101	0.555215
199	0.0461459	0.0157664	0.00202181	0.251241	0.000626392	0.00573649	0.00898083	0.0320539	0.00192056	0.00335806	0.0023647	0.0350596	0.0372686	0.128651	0.0600454	1.5182	4.51261	0.368531	0.151051	1.98166	0.930112
200	0.592185	0.0302678	0.00192064	0.951867	0.000545637	0.0149071	0.0608713	9.43479	0.00192469	0.00379313	0.00448219	3.79028	0.486051	0.478167	0.253905	2.27683	1.50371	0.164906	0.148346	1.03634	1.03731

## Sheet: Table S3
Table S3	Candidate genes indentified from eQTL mapping of C.gigas.gigas
Gene Name	SNP	Position	Candidate Gene ID	Candidate Gene Name	Annotation
HSPA4	Marker13973	scaffold41136_3037	CGI_10004724	RL10A	60S ribosomal protein L10a
			CGI_10004725	UBP47	Ubiquitin carboxyl-terminal hydrolase 47
HSPA5-08834	Marker33151	scaffold44008_61613	CGI_10015279
			CGI_10015280	C3ZMI8	Putative uncharacterized protein
			CGI_10015281
			CGI_10015282	FA92B	Protein FAM92B
			CGI_10015283	SC6A5	Sodium- and chloride-dependent glycine transporter 2
			CGI_10015284
			CGI_10015285
	Marker10740	scaffold1529_7177	CGI_10000618
	Marker33136	scaffold44008_255284	CGI_10015293	F101B	Protein FAM101B
			CGI_10015294	DUPD1	Dual specificity phosphatase DUPD1
			CGI_10015295
			CGI_10015296	DUPD1	Dual specificity phosphatase DUPD1
			CGI_10015297	SALL3	Sal-like protein 3
			CGI_10015298	SALL1	spalt like transcription factor 1
	Marker41142	scaffold783_146250	CGI_10011677	NEK1	Serine/threonine-protein kinase Nek1
			CGI_10011678	AMPC	Beta-lactamase OS=Pseudomonas aeruginosa
			CGI_10011679	ARHGH	Rho guanine nucleotide exchange factor 17
			CGI_10011680	CM038	UPF0594 protein C13orf38 homolog
	Marker15781	scaffold1835_47053	CGI_10015176
			CGI_10015177	FMRF	FMRFamide neuropeptides
			CGI_10015178	TRI45	Tripartite motif-containing protein 45
			CGI_10015179	KDM1B	Lysine-specific histone demethylase 1B
			CGI_10015180	CML12	Calmodulin-like protein 12
			CGI_10015181
	Marker27538	scaffold41452_71116	CGI_10005078
			CGI_10005079
			CGI_10005080	PMP22	Peripheral myelin protein 22
			CGI_10005081
			CGI_10005082
	Marker7956	scaffold1328_270107	CGI_10012989	RECS	Probable ATP-dependent DNA helicase
			CGI_10012991	AOSL	Allene oxide synthase-lipoxygenase protein
			CGI_10012992
			CGI_10012993	RECQ	ATP-dependent DNA helicase recQ OS=Escherichia coli (strain K12)
	Marker9159	scaffold1419_109099	CGI_10005452	RN213	RING finger protein 213
			CGI_10005453	RN213	RING finger protein 213
	Marker10629	scaffold1521_439991	CGI_10017951
			CGI_10017952	PI2R	Prostacyclin receptor
			CGI_10017953	PI2R	Prostacyclin receptor
			CGI_10017954	LAS1L	LAS1-like protein
			CGI_10017955	ZC12C	Probable ribonuclease ZC3H12C
			CGI_10017956
			CGI_10017957
			CGI_10017958	SODC	Superoxide dismutase
			CGI_10017959
	Marker10627	scaffold1521_438872	同Marker10629
	Marker31512	scaffold433_309937	CGI_10027061	TFE3	Transcription factor E3
			CGI_10027062	MIB2	E3 ubiquitin-protein ligase MIB2
			CGI_10027063
			CGI_10027064
			CGI_10027065	MIB2	E3 ubiquitin-protein ligase MIB2
	Marker14828	scaffold1780_220151	CGI_10014552
			CGI_10014553	YDJ1	Uncharacterized protein ZK1073.1
			CGI_10014554	TAG53	Putative protein tag-53
			CGI_10014555	MARH5	E3 ubiquitin-protein ligase MARCH5
	Marker10724	scaffold1528_250138	CGI_10013223	CC146	Coiled-coil domain-containing protein 146
			CGI_10013224	FGFR	Fibroblast growth factor receptor
			CGI_10013225
			CGI_10013226	DBR1A	Lariat debranching enzyme A
			CGI_10013227	MEG10	Multiple epidermal growth factor-like domains 10
			CGI_10013228	PTPRE	Receptor-type tyrosine-protein phosphatase epsilon
			CGI_10013229	PTPRT	Receptor-type tyrosine-protein phosphatase T
	Marker703	C27644_2375	CGI_10000374	AKAP9	A-kinase anchor protein 9
	Marker33539	scaffold448_530149	CGI_10024949
			CGI_10024950
			CGI_10024951	CF150	Uncharacterized protein C6orf150
			CGI_10024952
	Marker12878	scaffold1670_178118	CGI_10017602
			CGI_10017603
			CGI_10017604
			CGI_10017605
			CGI_10017606	CP070	UPF0183 protein C16orf70 homolog
			CGI_10017607	YELL	Protein yellow
			CGI_10017608	TMC7	Transmembrane channel-like protein 7
			CGI_10017609
	Marker8139	scaffold1345_208524	CGI_10016281
			CGI_10016283
	Marker28235	scaffold41928_69535	CGI_10005836	OPN4	Melanopsin
			CGI_10005837	OPSO	Opsin-VA
	Marker6920	scaffold1258_721819	CGI_10023510
			CGI_10023511	CG063	Uncharacterized protein
			CGI_10023512
	Marker15528	scaffold1819_144537	CGI_10007291
			CGI_10007292	ZAN	Zonadhesin
			CGI_10007293
			CGI_10007294	BARD1	BRCA1-associated RING domain protein 1
			CGI_10007295	HECW2	E3 ubiquitin-protein ligase HECW2
			CGI_10007296	ACTC	Actin, cytoplasmic
	Marker28234	scaffold41928_64485	CGI_10005836
			CGI_10005837
	Marker4471	scaffold1132_115252	CGI_10023311	B3GT5	Beta-1,3-galactosyltransferase 5
			CGI_10023312	ZN235	Zinc finger protein 235
			CGI_10023313	ANPRA	Atrial natriuretic peptide receptor A
	Marker2868	scaffold1031_42240	CGI_10019690
			CGI_10019691
			CGI_10019692	CALRL	Calcitonin gene-related peptide type 1 receptor
			CGI_10019693
			CGI_10019694
	Marker10542	scaffold1518_343997	CGI_10017805	RALA	Ras-related protein Ral-A
			CGI_10017806	MED1	Mediator of RNA polymerase II transcription subunit 1
			CGI_10017807	RASM	Ras-related protein M-Ras
			CGI_10017809	PTF1A	Pancreas transcription factor 1 subunit alpha
HSPA12A	Marker18003	scaffold204_683903	CGI_10026121	DHI2	Corticosteroid 11-beta-dehydrogenase isozyme 2
			CGI_10026122	SYCP3	Synaptonemal complex protein 3
			CGI_10026123	APIP	APAF1-interacting protein
			CGI_10026124	FMRF	FMRF-amide neuropeptides
			CGI_10026125	CB065	Uncharacterized protein C2orf65
			CGI_10026126	NAT10	N-acetyltransferase 10
			CGI_10026127	K1239	Leucine-rich repeat and WD repeat-containing protein KIAA1239
			CGI_10026128
	Marker17987	scaffold204_528213	CGI_10026112
			CGI_10026113
			CGI_10026114	PLCD1	1-phosphatidylinositol-4,5-bisphosphate phosphodiesterase delta-1
			CGI_10026115	PLCL1	Inactive phospholipase C-like protein 1
			CGI_10026116	MTMRD	Myotubularin-related protein 13
			CGI_10026117	ZBT40	Zinc finger and BTB domain-containing protein 40
			CGI_10026118
	Marker7064	scaffold1267_864386	CGI_10025173
			CGI_10025174	DPOLZ	DNA polymerase zeta catalytic subunit
	Marker25714	scaffold3_1103457	CGI_10027319	Y3136	Clavaminate synthase-like protein At3g21360
			CGI_10027320	YD026	Putative death domain-containing protein
			CGI_10027321
			CGI_10027322
			CGI_10027323	TIGAR	Probable fructose-2,6-bisphosphatase TIGAR
			CGI_10027324
			CGI_10027325
			CGI_10027326	FHL2	Four and a half LIM domains protein 2
			CGI_10027327	PRIC3	Prickle-like protein 3
HSPA12B-22078	Marker2650	scaffold1024_72373	CGI_10028518	PI51A	Phosphatidylinositol-4-phosphate 5-kinase type-1 alpha
			CGI_10028519
			CGI_10028520
			CGI_10028522
	Marker25714
HYOU1	Marker27468	scaffold413_557373	CGI_10022806	Y1221	Uncharacterized protein MJ1221 OS=Methanocaldococcus jannaschii
			CGI_10022807	HAP28	28 kDa heat- and acid-stable phosphoprotein
			CGI_10022808	ATF5	activating transcription factor 5 (ATF5)
			CGI_10022809	CE035	Uncharacterized protein
			CGI_10022810	ZNFX1	NFX1-type zinc finger-containing protein 1
			CGI_10022811	ADHX	Alcohol dehydrogenase class-3
			CGI_10022812	GALR2	Galanin receptor type 2
			CGI_10022813	KY	Kyphoscoliosis peptidase
			CGI_10022814
			CGI_10022815
			CGI_10022816
			CGI_10022817	JOS2	Josephin-2
	Marker8681	scaffold1376_19213	CGI_10002794	HS12B	Heat shock 70 kDa protein 12B
			CGI_10002795	HS12A	Heat shock 70 kDa protein 12A
			CGI_10002796	MAPIP	Mitogen-activated protein-binding protein-interacting protein
	Marker3769	scaffold1094_131995	CGI_10021810
			CGI_10021811	SOX14	Putative transcription factor SOX-14
			CGI_10021812
			CGI_10021813	G2E3	G2/M phase-specific E3 ubiquitin-protein ligase
			CGI_10021814
			CGI_10021815	HUNK	Hormonally up-regulated neu tumor-associated kinase
	Marker11522	scaffold1583_131249	CGI_10025807	GTPB1	GTP-binding protein 1
			CGI_10025808	GABT	4-aminobutyrate aminotransferase, mitochondrial
			CGI_10025809	PDLI5	PDZ and LIM domain protein 5
			CGI_10025810	PDLI1	PDZ and LIM domain protein 1
			CGI_10025811
			CGI_10025812	OVCH1	Ovochymase-1
			CGI_10025813
			CGI_10025814	DRGX	Dorsal root ganglia homeobox protein
			CGI_10025815	TPMT	Probable thiopurine S-methyltransferase
HSPA13	Marker2650
	Marker28123	scaffold41852_91422	CGI_10005729
			CGI_10005730	FRRS1	Ferric-chelate reductase 1
			CGI_10005731	FRRS1	Ferric-chelate reductase 1
			CGI_10005732
			CGI_10005733
			CGI_10005734
			CGI_10005735
			CGI_10005736	TRIM2	Tripartite motif-containing protein 2
	Marker36671	scaffold57_24275	CGI_10020528	DHGL	Glucose dehydrogenase [acceptor]
			CGI_10020530	SDH	L-sorbose 1-dehydrogenase
			CGI_10020531	CHDH	Choline dehydrogenase, mitochondrial
			CGI_10020533
			CGI_10020534
			CGI_10020535
			CGI_10020536	PAX6	Paired box protein Pax-6 OS=Coturnix coturnix japonica
			CGI_10020537
	Marker23231	scaffold37278_28583	CGI_10002319
			CGI_10002320
			CGI_10002321
	Marker7064
	Marker25714
	Marker30775	scaffold43116_134548	CGI_10008811	SF3A3	Splicing factor 3A subunit 3
			CGI_10008812	MPP8	M-phase phosphoprotein 8
			CGI_10008813	KCD10	BTB/POZ domain-containing protein KCTD10
			CGI_10008814	SFT2B	Vesicle transport protein SFT2B
			CGI_10008815	IF2H	Eukaryotic translation initiation factor 2 subunit 3, Y-linked
			CGI_10008816	MBTP2	Membrane-bound transcription factor site-2 protease
			CGI_10008817
			CGI_10008818
			CGI_10008819	HGFL	Hepatocyte growth factor-like protein
	Marker7035	scaffold1267_523258	CGI_10025154
			CGI_10025155	PGCA	Aggrecan core protein
			CGI_10025156	JIP1	JNK-interacting protein 1
			CGI_10025157
	Marker14539	scaffold1760_23680	CGI_10002757	CP20A	Cytochrome P450 20A1
			CGI_10002758	APOL3	Apolipoprotein L3
	Marker36658	scaffold57_122349	CGI_10020537
			CGI_10020538	TEX11	Testis-expressed sequence 11 protein
			CGI_10020539	QORX	Quinone oxidoreductase PIG3
			CGI_10020540
			CGI_10020541
			CGI_10020542	ST3A1	Amine sulfotransferase
			CGI_10020543	IFT88	Intraflagellar transport protein 88 homolog
			CGI_10020544	AFAD	Afadin
	Marker12988	scaffold1673_314699	CGI_10013577	CCD81	Coiled-coil domain-containing protein 81
			CGI_10013578	CYTB	Cystatin-B
			CGI_10013579
			CGI_10013580	TPC2	Two pore calcium channel protein 2
			CGI_10013581
			CGI_10013582
	Marker36719	scaffold57_59190	CGI_10020531
			CGI_10020530
			CGI_10020532	DHGL	Glucose dehydrogenase
			CGI_10020533
			CGI_10020534
			CGI_10020535
			CGI_10020536
			CGI_10020537
			CGI_10020538
			CGI_10020539
	Marker32365	scaffold43764_80302	CGI_10012176	DPOLZ	DNA polymerase zeta catalytic subunit
			CGI_10012177	CCKAR	Cholecystokinin receptor
			CGI_10012178	ITB3	Integrin beta-3
			CGI_10012179	ITB3	Integrin beta-3
HSPA12B-12492	Marker1504	C33580_7261
	Marker4421	C33580_253875	CGI_10010655	NUAK1	NUAK family SNF1-like kinase 1
			CGI_10010656	WASP	Wiskott-Aldrich syndrome protein
			CGI_10010657	MLL5	Histone-lysine N-methyltransferase MLL5
	Marker13855	scaffold1726_135440	CGI_10015632
			CGI_10015633	VWDE	von Willebrand factor D and EGF domain-containing protein
			CGI_10015634	NOL9	Nucleolar protein 9
			CGI_10015635	GRM5	Metabotropic glutamate receptor 5
			CGI_10015636	TRPM1	Transient receptor potential cation channel subfamily M member 1
	Marker19208	scaffold257_1363509	CGI_10027947	MEG10	Multiple epidermal growth factor-like domains 10
			CGI_10027948	TRIM2	Tripartite motif-containing protein 2
			CGI_10027949	ABCA3	ATP-binding cassette sub-family A member 3
			CGI_10027950	ABCA3	ATP-binding cassette sub-family A member 3
			CGI_10027951	RAP1B	Ras-related protein Rap-1b
			CGI_10027952	MRP5	Multidrug resistance-associated protein 5
	Marker25714
	Marker7064
	Marker23231
HSPA9	Marker32411	scaffold43786_176179	CGI_10012348	HMCN1	Hemicentin-1
			CGI_10012349
			CGI_10012350
			CGI_10012351	PLMN	Plasminogen
			CGI_10012352	FSTL4	Follistatin-related protein 4
			CGI_10012353
			CGI_10012354	ZN333	Zinc finger protein 333
	Marker27538
	Marker257	C22888_1421
	Marker37157	scaffold591_679093	CGI_10027579	VWDE	von Willebrand factor D and EGF domain-containing protein
			CGI_10027580	ASCC1	Activating signal cointegrator 1 complex subunit 1
			CGI_10027581	ITPR2	Inositol 1,4,5-trisphosphate receptor type 2
	Marker19697	scaffold279_246751	CGI_10012629	A16L1	Autophagy-related protein 16-1
			CGI_10012630	SHP2A	Phosphatidylinositol-3,4,5-trisphosphate 5-phosphatase 2A
			CGI_10012631	RDH11	Retinol dehydrogenase 11
			CGI_10012632	RDH11	Retinol dehydrogenase 11
			CGI_10012633	Y104	Uncharacterized aminotransferase SSO0104
	Marker13973
HSPA5-15492	Marker18706	scaffold22_46558	CGI_10028822
			CGI_10028823
			CGI_10028824	I5P1	Type I inositol-1,4,5-trisphosphate 5-phosphatase
			CGI_10028825	NKX62	Homeobox protein Nkx-6.2
			CGI_10028826	PGSC2	Peptidoglycan-recognition protein SC2
			CGI_10028827	SUSD2	Sushi domain-containing protein 2
			CGI_10028828	FANCI	Fanconi anemia group I protein
	Marker18706
	Marker24364	scaffold38864_41178	CGI_10003015
			CGI_10003016	RENR	Renin receptor OS=Bos taurus
	Marker36081	scaffold546_454074	CGI_10021004	GCYB2	Guanylate cyclase soluble subunit beta-2
			CGI_10021005	GSHR	Glutathione reductase, mitochondrial
	Marker3682	scaffold1086_502970	CGI_10021947	TBC14	TBC1 domain family member 14
			CGI_10021948	RPB1	DNA-directed RNA polymerase II subunit RPB1
			CGI_10021949	PARG1	Poly(ADP-ribose) glycohydrolase 1
			CGI_10021950
	Marker37157
	Marker19697
	Marker28828	scaffold42164_60931	CGI_10006312	CC147	Coiled-coil domain-containing protein 147
			CGI_10006313	CA069	Putative transferase C1orf69 homolog, mitochondrial
			CGI_10006314	CP26B	Cytochrome P450 26B1
			CGI_10006315	ATL2D	Putative RING-H2 finger protein ATL2D
			CGI_10006316	MLRA	Myosin regulatory light chain A, smooth adductor muscle
			CGI_10006317	CC125	Coiled-coil domain-containing protein 125
			CGI_10006318	RM43	39S ribosomal protein L43, mitochondrial
			CGI_10006319	FEM1C	Protein fem-1 homolog C
			CGI_10006320	COX15	Cytochrome c oxidase assembly protein COX15
			CGI_10006321	PAOX	Peroxisomal N(1)-acetyl-spermine/spermidine oxidase
			CGI_10006322	SMC3	Structural maintenance of chromosomes protein 3
	Marker12828	scaffold1662_23653	CGI_10004949	HS12A	Heat shock 70 kDa protein 12A
			CGI_10004950	ADAP1	Arf-GAP with dual PH domain-containing protein 1
			CGI_10004951	HS12A	Heat shock 70 kDa protein 12A
			CGI_10004952
			CGI_10004953	MAT2B	Methionine adenosyltransferase 2 subunit beta
			CGI_10004954
			CGI_10004955	APC10	Anaphase-promoting complex subunit 10
			CGI_10004956	ACSF4	Acyl-CoA synthetase family member 4
	Marker29505	scaffold42524_108597	CGI_10007096	TDRD3	Tudor domain-containing protein 3
	Marker48637	scaffold1404_42912	CGI_10008822
			CGI_10008823
			CGI_10008824	NOP16	Nucleolar protein 16
			CGI_10008825
			CGI_10008826
			CGI_10008827
			CGI_10008828	CAN5	Calpain-5 OS=Homo sapiens
	Marker37343	scaffold597_59403	CGI_10004927	CAH12	Carbonic anhydrase 12
			CGI_10004928	TRIM2	Tripartite motif-containing protein 2
			CGI_10004929	CAN5	Calpain-5 OS=Homo sapiens
			CGI_10004930	NOX5	NADPH oxidase 5
	Marker25959	scaffold40120_25532	CGI_10003877	KTHY	Thymidylate kinase
			CGI_10003878	KTHY	Thymidylate kinase
			CGI_10003879	STK25	Serine/threonine-protein kinase 25
	Marker21815	scaffold348_386693	CGI_10022979	YKT6	Synaptobrevin homolog YKT6
			CGI_10022980	AMER1	AMME syndrome candidate gene 1 protein homolog
			CGI_10022981	FA53A	Protein FAM53A
			CGI_10022982	LRCH3	Leucine-rich repeat and calponin homology domain-containing protein 3
			CGI_10022983	WDR53	WD repeat-containing protein 53
			CGI_10022984	MTMR9	Myotubularin-related protein 9
	Marker53000	scaffold22_15729	CGI_10028822
			CGI_10028823
			CGI_10028824
			CGI_10028825
	Marker24565	scaffold39078_12761	CGI_10003179
			CGI_10003180
			CGI_10003181
	Marker11127	scaffold1563_41858	CGI_10002335	BAP31	B-cell receptor-associated protein 31
			CGI_10002336	KY	Kyphoscoliosis peptidase
	Marker43137	scaffold896_364956	CGI_10022840
			CGI_10022841
			CGI_10022842
			CGI_10022843	AOF	Amine oxidase
			CGI_10022844	AOF	Amine oxidase
			CGI_10022845	AOF	Amine oxidase
			CGI_10022846	AAAD	Arylacetamide deacetylase
			CGI_10022847
			CGI_10022848	CHRD	Chordin
	Marker7956
	Marker20355	scaffold30826_7113	CGI_10000672	TENR	Tenascin-R
	Marker22055	scaffold35250_12268	CGI_10001442
	Marker10372	scaffold150_1594270	CGI_10028689	GAK	Cyclin G-associated kinase
			CGI_10028690
			CGI_10028691
			CGI_10028692	TM111	Transmembrane protein 111
			CGI_10028693	UXT	Protein UXT homolog
			CGI_10028694	TKTL2	Transketolase-like protein 2
	Marker45911	scaffold1041_323983	CGI_10014678	CASP2	Caspase-2 OS=Gallus gallus GN=CASP2
			CGI_10014679	CRADD	Death domain-containing protein CRADD
			CGI_10014680	KTEL1	KTEL motif-containing protein 1
			CGI_10014681	WASH4	Putative WAS protein family homolog 4
			CGI_10014682	NHAX	Stress response protein
			CGI_10014683	Y1388	Uncharacterized protein sll1388
			CGI_10014684	NCAH	Neurocalcin homolog
			CGI_10014685	Y1388	Uncharacterized protein sll1388
			CGI_10014686
			CGI_10014687	CCD41	Coiled-coil domain-containing protein 41
			CGI_10014688	VEZA	Vezatin
			CGI_10014689	CASPA	Caspase-10
			CGI_10014690	CASP7	Caspase-7
			CGI_10014691
	Marker37319	scaffold596_124373	CGI_10009572	ABCA3	ATP-binding cassette sub-family A member 3
			CGI_10009573	ABCA3	ATP-binding cassette sub-family A member 3
			CGI_10009574	SCR11	S-crystallin SL11
			CGI_10009575	HUWE1	E3 ubiquitin-protein ligase HUWE1
			CGI_10009576	PUS7	Pseudouridylate synthase 7 homolog
	Marker23499	scaffold37724_46804	CGI_10002464	ST32B	Serine/threonine-protein kinase 32B
			CGI_10002465	LRC27	Leucine-rich repeat-containing protein 27
	Marker36324	scaffold557_276893	CGI_10017967	HAKAI	E3 ubiquitin-protein ligase Haka
			CGI_10017968	UBP19	Ubiquitin carboxyl-terminal hydrolase 19
			CGI_10017969
			CGI_10017970
			CGI_10017971
			CGI_10017972
			CGI_10017973	GIMA4	GTPase IMAP family member 4
			CGI_10017974	CQ053	Uncharacterized protein C17orf53 homolog
	Marker37730	scaffold610_144025	CGI_10021088
			CGI_10021089
			CGI_10021091
			CGI_10021092
			CGI_10021094	US6NL	USP6 N-terminal-like protein
			CGI_10021095
			CGI_10021096	TRIM2	Tripartite motif-containing protein 2
			CGI_10021097	TRIM3	Tripartite motif-containing protein 3
	Marker7385	scaffold1299_88272	CGI_10007576	SYTL5	Synaptotagmin-like protein 5
			CGI_10007577	ANM3	Protein arginine N-methyltransferase 3
			CGI_10007578	CSDE1	Cold shock domain-containing protein E1
			CGI_10007579	CHM2A	Charged multivesicular body protein 2a
			CGI_10007580
			CGI_10007581
			CGI_10007582	SON	Protein SON
			CGI_10007583	CG046	Uncharacterized protein C7orf46 homolog
			CGI_10007584	GPR22	Probable G-protein coupled receptor 22
			CGI_10007585	C1QT3	Complement C1q tumor necrosis factor-related protein 3
			CGI_10007586	CB037	Protein C2orf37 homolog
	Marker29316	scaffold42422_281	CGI_10006847	NIT2B	Omega-amidase NIT2-B
			CGI_10006848	HTS	Protein hu-li tai shao
			CGI_10006849	GPAT1	Glycerol-3-phosphate acyltransferase 1, mitochondrial
			CGI_10006850
	Marker22077	scaffold352_172789	CGI_10012247	CO044	UPF0464 protein C15orf44
			CGI_10012248	NOTC2	Neurogenic locus notch homolog protein 2
			CGI_10012249
			CGI_10012250
	Marker9130	scaffold1411_150135	CGI_10009187
			CGI_10009188
			CGI_10009190
			CGI_10009191
			CGI_10009192
			CGI_10009193	TSEAR	Protein TSPEAR
			CGI_10009194	CO6A4	Collagen alpha-4(VI) chain
SIP1	Marker34975	scaffold501_880103	CGI_10027532	FMAR	FMRFamide receptor
			CGI_10027533	TF3C1	General transcription factor 3C polypeptide 1
			CGI_10027534
			CGI_10027535
			CGI_10027536
			CGI_10027537
HSPB1	Marker30594	scaffold43034_3662	CGI_10008467	DNA2L	DNA2-like helicase
			CGI_10008468	CLIP1	CAP-Gly domain-containing linker protein 1
	Marker13973
DJB13	Marker5101	scaffold1172_36291	CGI_10006903	TEX9	Testis-expressed sequence 9 protein
			CGI_10006904	RFX5	DNA-binding protein RFX5
			CGI_10006905	MESD1	Mesoderm development candidate 1
			CGI_10006906	GABP1	GA-binding protein subunit beta-1
			CGI_10006907	CPT1A	Carnitine O-palmitoyltransferase 1, liver isoform
			CGI_10006908	POGZ	Pogo transposable element with ZNF domain
	Marker19744	scaffold280_380733	CGI_10024588	MOT2	Monocarboxylate transporter 2
			CGI_10024589	FMT	Methionyl-tRNA formyltransferase, mitochondrial
			CGI_10024590
	Marker30102	scaffold42790_85701	CGI_10007717	TDRKH	Tudor and KH domain-containing protein
			CGI_10007718	PATS1	Probable serine/threonine-protein kinase pats1
	Marker8291	scaffold1350_390188	CGI_10017314	FZD5	Frizzled-5
			CGI_10017315
			CGI_10017316
			CGI_10017317	ADA10	Disintegrin and metalloproteinase domain-containing protein 10
			CGI_10017318	ANK3	Ankyrin-3
	Marker23397	scaffold37576_25076	CGI_10002419	CF134	UPF0635 protein C6orf134
			CGI_10002420	GNL1	Guanine nucleotide-binding protein-like 1
			CGI_10002421	CHIA	Acidic mammalian chitinase
			CGI_10002422
	Marker31425	scaffold43364_48122	CGI_10009869
	Marker41379	scaffold790_192538	CGI_10013167
			CGI_10013168
			CGI_10013169	SFXN2	Sideroflexin-2
			CGI_10013170	BRDT	Bromodomain testis-specific protein
			CGI_10013171
			CGI_10013172	AER61	Uncharacterized glycosyltransferase AER61
	Marker13140	scaffold168_443983	CGI_10025593	NBR1	Next to BRCA1 gene 1 protein
			CGI_10025594	VILI	Villin-1
			CGI_10025595
			CGI_10025596	DNJC7	DnaJ homolog subfamily C member 7
	Marker127	C20390_592
	Marker30763	scaffold43108_21480	CGI_10008833
			CGI_10008834	GRP78	78 kDa glucose-regulated protein
			CGI_10008835	DHE2	NAD-specific glutamate dehydrogenase
			CGI_10008836	EI3GA	Eukaryotic translation initiation factor 3 subunit G-A
			CGI_10008837	C10	Protein C10
			CGI_10008838	MA1B1	Endoplasmic reticulum mannosyl-oligosaccharide 1,2-alpha-mannosidase
	Marker8476	scaffold1362_214866	CGI_10023931	LIPP	Pancreatic triacylglycerol lipase (Fragment)
			CGI_10023932	LIPP	Pancreatic triacylglycerol lipase (Fragment)
			CGI_10023933	KLHL3	Kelch-like protein 3
			CGI_10023934	DIAP2	Protein diaphanous homolog 2
			CGI_10023935	HRH3	Histamine H3 receptor
			CGI_10023936	HRH4	Histamine H4 receptor
	Marker18563	scaffold226_865324	CGI_10025378	CNN2	Calponin-2 (Fragment)
			CGI_10025379	UNC87	Protein unc-87
			CGI_10025380
			CGI_10025381	IGDC3	Immunoglobulin superfamily DCC subclass member 3
			CGI_10025382	WIF1	Wnt inhibitory factor 1
			CGI_10025383	VWDE	von Willebrand factor D and EGF domain-containing protein
			CGI_10025384	CB024	Uncharacterized protein C2orf24 homolog
			CGI_10025385	DIP2C	Disco-interacting protein 2 homolog C
			CGI_10025386	CSN8	COP9 signalosome complex subunit 8
			CGI_10025387	YDAC	Uncharacterized methyltransferase ydaC
			CGI_10025388	K0831	Uncharacterized protein KIAA0831
	Marker32635	scaffold43868_119584	CGI_10013653
			CGI_10013654	OVO	Protein ovo
			CGI_10013655	ZCH10	Zinc finger CCHC domain-containing protein 10
			CGI_10013656	DLL1	Delta-like protein 1
	Marker61140	scaffold563_295911	CGI_10019827	NAGAB	Alpha-N-acetylgalactosaminidase
			CGI_10019828	K1712	Uncharacterized protein KIAA1712 homolog
			CGI_10019829	CH055	UPF0670 protein C8orf55 homolog
			CGI_10019830	TIM8	Mitochondrial import inner membrane translocase subunit Tim8
			CGI_10019831	CT152	Uncharacterized protein C20orf152
			CGI_10019832	MD2L2	Mitotic spindle assembly checkpoint protein MAD2B
			CGI_10019833
			CGI_10019834
			CGI_10019835	TBB	Tubulin beta chain
	Marker30375	scaffold42946_104912	CGI_10008172	YMS5	Uncharacterized protein K03H1.5
			CGI_10008173	YMS5	Uncharacterized protein K03H1.5
			CGI_10008174	YMS5	Uncharacterized protein K03H1.5
			CGI_10008175	SUSD2	Sushi domain-containing protein 2
			CGI_10008176	GLRA3	Glycine receptor subunit alpha-3
			CGI_10008177	GLRA1	Glycine receptor subunit alphaZ1
			CGI_10008178	PCDH1	Protocadherin-1
			CGI_10008179	PCDH9	Protocadherin-9
	Marker49874	scaffold1589_767785	CGI_10024128
			CGI_10024129
	Marker13153	scaffold168_566088	CGI_10025597
			CGI_10025598
			CGI_10025599	CRFM7	CHRNA7-FAM7A fusion protein
			CGI_10025600	CRFM7	CHRNA7-FAM7A fusion protein
			CGI_10025601	C1QT3	Complement C1q tumor necrosis factor-related protein 3
	Marker32651	scaffold43868_334285	CGI_10013668	PC11X	Protocadherin-11 X-linked
			CGI_10013669
			CGI_10013670
			CGI_10013671	TLR22	Toll-like receptor 2 type-2
	Marker25835	scaffold40026_79442	CGI_10003829	RL28	60S ribosomal protein L28
			CGI_10003830	SYYC	Tyrosyl-tRNA synthetase, cytoplasmic
			CGI_10003831
	Marker35788	scaffold53_442233	CGI_10026660
			CGI_10026662	GLPK	Glycerol kinase
			CGI_10026663
			CGI_10026664	GLPK	Glycerol kinase
			CGI_10026665	ETS2	Protein C-ets-2
			CGI_10026666
			CGI_10026667
	Marker23437	scaffold376_175035	CGI_10019494
			CGI_10019495	ROBO2	Roundabout homolog 2
			CGI_10019496
			CGI_10019497
	Marker3745	scaffold1093_376121	CGI_10019799	DENR	Density-regulated protein
			CGI_10019800
			CGI_10019801	ALF	Fructose-bisphosphate aldolase
			CGI_10019802	VKORL	Vitamin K epoxide reductase complex subunit 1-like protein 1
			CGI_10019803	GSTT4	Glutathione S-transferase theta-4
			CGI_10019804	GSTT1	Glutathione S-transferase theta-1
			CGI_10019805
			CGI_10019806	5HT2C	5-hydroxytryptamine receptor 2C
			CGI_10019807	GIMA4	GTPase IMAP family member 4
			CGI_10019808	CONT	Contactin
	Marker8509	scaffold1362_684177	CGI_10023953	DACH1	Dachshund homolog 1
			CGI_10023954	TMM33	Transmembrane protein 33
			CGI_10023955	HAND2	Heart- and neural crest derivatives-expressed protein 2
	Marker29104	scaffold42274_21644	CGI_10006508
			CGI_10006509
			CGI_10006510	SPAT4	Spermatogenesis-associated protein 4
			CGI_10006511	SYHC	Histidyl-tRNA synthetase, cytoplasmic
			CGI_10006512
	Marker6180	scaffold121_791185	CGI_10025673	KDM2B	Lysine-specific demethylase 2B
			CGI_10025674	BCKD	3-methyl-2-oxobutanoate dehydrogenase [lipoamide]] kinase, mitochondrial
			CGI_10025675
			CGI_10025676	PCFT	Proton-coupled folate transporter
			CGI_10025677	U119B	Protein unc-119 homolog B
			CGI_10025678	V162	Putative ankyrin repeat protein FPV162
			CGI_10025679
			CGI_10025680	PYRC	Dihydroorotase
	Marker7433	scaffold1301_1057810	CGI_10027756	PRPS1	Ribose-phosphate pyrophosphokinase 1
			CGI_10027757	UBCD4	Ubiquitin-conjugating enzyme E2-22 kDa
			CGI_10027758	LMO7	LIM domain only protein 7
			CGI_10027759	FBXW7	F-box/WD repeat-containing protein 7
			CGI_10027760
	Marker13132	scaffold168_434315	CGI_10025592	CCAPR	Cardioacceleratory peptide receptor
			CGI_10025593
			CGI_10025594
			CGI_10025595
			CGI_10025596
	Marker13405	scaffold1703_529120	CGI_10023063	PHYD1	Phytanoyl-CoA dioxygenase domain-containing protein 1
			CGI_10023064	CACP	Carnitine O-acetyltransferase
			CGI_10023065
			CGI_10023066	DAB2P	Disabled homolog 2-interacting protein
	Marker13405
DNJB4	Marker34975
	Marker38934	scaffold675_129230	CGI_10017854	CATC	Dipeptidyl-peptidase 1
			CGI_10017855	PLEK	Pleckstrin
			CGI_10017856
			CGI_10017857	ITIH3	Inter-alpha-trypsin inhibitor heavy chain H3
			CGI_10017858	BXL5	Probable beta-D-xylosidase 5
			CGI_10017859	GCC1	GRIP and coiled-coil domain-containing protein 1
			CGI_10017860	ESF1	ESF1 homolog
ATG7	Marker39644	scaffold70_869872	CGI_10024794	APMAP	Adipocyte plasma membrane-associated protein
			CGI_10024795	FIMB	Fimbrin
			CGI_10024796	SLC46A1	Proton-coupled folate transporter
			CGI_10024797	CN174	SAM domain-containing protein C14orf174
			CGI_10024798	KPCD3	Serine/threonine-protein kinase D3
			CGI_10024799	PKHH1	Pleckstrin homology domain-containing family H member 1
			CGI_10024800	CS010	UPF0556 protein C19orf10 homolog
			CGI_10024801	DHB4	Peroxisomal multifunctional enzyme type 2
			CGI_10024802
	Marker44073	scaffold964_65183	CGI_10009727
			CGI_10009728
			CGI_10009729	UBIE	Menaquinone biosynthesis methyltransferase ubiE
			CGI_10009730
			CGI_10009731	CUL4A	Cullin-4A
			CGI_10009732	NALDL	N-acetylated-alpha-linked acidic dipeptidase-like protein
	Marker6381	scaffold1228_265959	CGI_10016988	ANO1	Anoctamin-1
			CGI_10016989	IFIH1	Interferon-induced helicase C domain-containing protein 1
			CGI_10016990	DDX58	Probable ATP-dependent RNA helicase DDX58
			CGI_10016991
			CGI_10016992
			CGI_10016993
	Marker12663	scaffold1650_329609	CGI_10017776
			CGI_10017777	TRIM2	Tripartite motif-containing protein 2
			CGI_10017778	DPEP1	Dipeptidase 1
			CGI_10017779	ANR44	Serine/threonine-protein phosphatase 6 regulatory ankyrin repeat subunit B
	Marker10369	scaffold150_1542184	CGI_10028688	VA714	Vesicle-associated membrane protein 714
			CGI_10028689
			CGI_10028690
	Marker36325	scaffold557_287055	CGI_10017967
			CGI_10017968
			CGI_10017969
			CGI_10017970
			CGI_10017971
			CGI_10017972
			CGI_10017973
			CGI_10017974
			CGI_10017975
	Marker21334	scaffold337_410676	CGI_10028056	HUWE1	E3 ubiquitin-protein ligase HUWE1
			CGI_10028057	CC059	Uncharacterized protein C3orf59
			CGI_10028058	PCTK1	Serine/threonine-protein kinase PCTAIRE-1
			CGI_10028059	DCR1B	DNA cross-link repair 1B protein
			CGI_10028060
			CGI_10028061
			CGI_10028062
			CGI_10028063	S35B4	UDP-xylose and UDP-N-acetylglucosamine transporter
			CGI_10028064	C1QL4	Complement C1q-like protein 4
			CGI_10028065
			CGI_10028066	NCAN	Neurocan core protein
	Marker14353	scaffold1750_30831	CGI_10021460
			CGI_10021461
			CGI_10021462	HBXIP	Protein HBXIP homolog
			CGI_10021463
			CGI_10021464	FBXW7	F-box/WD repeat-containing protein 7
			CGI_10021465	DCR1C	Protein artemis
			CGI_10021466	GP175	Integral membrane protein GPR175
	Marker5143	scaffold1174_383666	CGI_10026034	PATS1	Probable serine/threonine-protein kinase pats1
			CGI_10026035	MIB1	E3 ubiquitin-protein ligase MIB1
			CGI_10026036	MIB1	E3 ubiquitin-protein ligase MIB1
			CGI_10026037	CABL1	CDK5 and ABL1 enzyme substrate 1
			CGI_10026038	RFESD	Rieske domain-containing protein
			CGI_10026039	ADPRM	Manganese-dependent ADP-ribose/CDP-alcohol diphosphatase
			CGI_10026040
	Marker14346	scaffold1750_226987	CGI_10021472	SRGP1	SLIT-ROBO Rho GTPase-activating protein 1
			CGI_10021473	NRF1	Nuclear respiratory factor 1
			CGI_10021474	NRF1	Nuclear respiratory factor 1
			CGI_10021475
			CGI_10021476	KLH10	Kelch-like protein 10
			CGI_10021477	PBX4	Pre-B-cell leukemia transcription factor 4
			CGI_10021478	SLOB	Slowpoke-binding protein
			CGI_10021479	LRGUK	Leucine-rich repeat and guanylate kinase domain-containing protein
			CGI_10021480	KARG	Arginine kinase
			CGI_10021481	KARG	Arginine kinase
	Marker48731	scaffold1423_921361	CGI_10025441	ACH10	Neuronal acetylcholine receptor subunit alpha-10
			CGI_10025442	S12A2	Solute carrier family 12 member 2
			CGI_10025443	HETE1	Vegetative incompatibility protein HET-E-1
			CGI_10025444	NXN	Nucleoredoxin
			CGI_10025445	RL23A	60S ribosomal protein L23a
			CGI_10025446	U631	UPF0631 protein
			CGI_10025447	MRP1	Multidrug resistance-associated protein 1
	Marker26545	scaffold40644_75629	CGI_10004304
			CGI_10004305
			CGI_10004306	CNR1B	Cannabinoid receptor type 1B
	Marker22766	scaffold365_122606	CGI_10022717
			CGI_10022718	LOV1	Location of vulva defective 1
			CGI_10022719	PK1L2	Polycystic kidney disease protein 1-like 2
			CGI_10022720	PK1L2	Polycystic kidney disease protein 1-like 2
			CGI_10022721	PK1L2	Polycystic kidney disease protein 1-like 2
			CGI_10022722	CRBL2	cAMP-responsive element-binding protein-like 2
	Marker17442	scaffold1901_3910	CGI_10015543	ITB1	Integrin beta-1
			CGI_10015544	CO8A2	Collagen alpha-2(VIII) chain
			CGI_10015545
BRKS2	Marker34975
	Marker32834	scaffold43954_129276	CGI_10014572	FA32A	Protein FAM32A-like
			CGI_10014573	SAS10	Something about silencing protein 10
			CGI_10014574	SRC42	Tyrosine-protein kinase Src42A
			CGI_10014575
			CGI_10014576	KANK1	KN motif and ankyrin repeat domain-containing protein 1
			CGI_10014577	T2FA	General transcription factor IIF subunit 1
			CGI_10014578	FBX4	F-box only protein 4
			CGI_10014579	RL371	Probable 60S ribosomal protein L37-A
	Marker35461	scaffold522_411090	CGI_10020327	GTR12	Solute carrier family 2, facilitated glucose transporter member 12
			CGI_10020328	PTER	Phosphotriesterase-related protein
			CGI_10020329	ASCC2	Activating signal cointegrator 1 complex subunit 2
			CGI_10020330	IPMK	Inositol polyphosphate multikinase
			CGI_10020331	TRAF7	E3 ubiquitin-protein ligase TRAF7
CLCN2	Marker20478	scaffold313_404277	CGI_10026598	CPG2	Chondroitin proteoglycan-2
			CGI_10026599	CHIA	Acidic mammalian chitinase
			CGI_10026600	CHIT1	Chitotriosidase-1
			CGI_10026601	CH3L2	Chitinase-3-like protein 2
			CGI_10026602	CHIT1	Chitotriosidase-1
			CGI_10026603	CHIT3	Probable chitinase 3
			CGI_10026604	CHIT3	Probable chitinase 3
			CGI_10026605	CHIT1	Chitotriosidase-1
	Marker30815	scaffold43130_121158	CGI_10008962	PA24A	Cytosolic phospholipase A2
			CGI_10008963	UBR4	E3 ubiquitin-protein ligase UBR4
			CGI_10008964	TRAF2	TNF receptor-associated factor 2
	Marker16655	scaffold1873_147584	CGI_10009295
			CGI_10009296	PHIPL	Phytanoyl-CoA hydroxylase-interacting protein-like
			CGI_10009297	PCD19	Protocadherin-19
			CGI_10009298	PCDH9	Protocadherin-9
			CGI_10009300	PCDH9	Protocadherin-9
	Marker36147	scaffold547_500831	CGI_10018858
			CGI_10018859	GSK3B	Glycogen synthase kinase-3 beta
			CGI_10018860
			CGI_10018861	TRIM2	Tripartite motif-containing protein 2
GAK	Marker13973
MTMR8	Marker4421
	Marker30371	scaffold42930_57359	CGI_10008122
			CGI_10008123	ITIH3	Inter-alpha-trypsin inhibitor heavy chain H3
			CGI_10008124
			CGI_10008125	TM168	Transmembrane protein 168
			CGI_10008126
	Marker12570	scaffold1646_47919	CGI_10007516
			CGI_10007517
			CGI_10007518
			CGI_10007519
			CGI_10007520
			CGI_10007521	SF3A2	Splicing factor 3A subunit 2
	Marker43580	scaffold93_13186	CGI_10002717	CL056	Uncharacterized protein C12orf56 homolog
			CGI_10002718
			CGI_10002719	TRIM2	Tripartite motif-containing protein 2
	Marker27852	scaffold41684_73242	CGI_10005433
			CGI_10005434
			CGI_10005435
	Marker21856	scaffold34952_17292	CGI_10001381	CRADD	Death domain-containing protein CRADD
	Marker8241	scaffold1348_74731	CGI_10008064	KRIT1	Krev interaction trapped protein 1
			CGI_10008065	H2A	Histone H2A
			CGI_10008066	H3	Histone H3
			CGI_10008067	H4	Histone H4
			CGI_10008068	H2B7	Histone H2B 7
			CGI_10008069	H2A	Histone H2A
			CGI_10008070	H1D	Histone H1-delta
			CGI_10008071	H3	Histone H3
			CGI_10008072	H4	Histone H4
			CGI_10008073	H2B7	Histone H2B 7
			CGI_10008074	H2A	Histone H2A
			CGI_10008075	H1D	Histone H1-delta
			CGI_10008076	H3	Histone H3
			CGI_10008077	H4	Histone H4
			CGI_10008078	H2B3	Histone H2B.3
			CGI_10008079	H2A	Histone H2A
			CGI_10008080	H1D	Histone H1-delta
			CGI_10008081	H3	Histone H3
			CGI_10008082	H4	Histone H4
			CGI_10008083	H2B3	Histone H2B.3
			CGI_10008084	H2A	Histone H2A
			CGI_10008085	H1D	Histone H1-delta
			CGI_10008086	H3	Histone H3
			CGI_10008087	H4	Histone H4
	Marker30815
	Marker16655
	Marker36147
	Marker128	C20430_469
	Marker16656	scaffold1873/_149599	CGI_10009297
			CGI_10009298
			CGI_10009300
RNF123	Marker3732	scaffold1093_22950	CGI_10019782
			CGI_10019783	MAGI1	Membrane-associated guanylate kinase, WW and PDZ domain-containing protein 1
			CGI_10019784	MAGI2	Membrane-associated guanylate kinase, WW and PDZ domain-containing protein 2
			CGI_10019785
			CGI_10019786	TRI45	Tripartite motif-containing protein 45
	Marker45911
	Marker19345	scaffold258_406651	CGI_10020061	CC020	Uncharacterized protein C3orf20
			CGI_10020062	DYRK2	Dual specificity tyrosine-phosphorylation-regulated kinase 2
			CGI_10020063	FBXL5	F-box/LRR-repeat protein 5
			CGI_10020064
			CGI_10020065
			CGI_10020066	LAC25	Laccase-25
			CGI_10020067	ACOX1	Peroxisomal acyl-coenzyme A oxidase 1
	Marker46451	scaffold1121_142361	CGI_10006502	CB060	JmjC domain-containing protein C2orf60 homolog
			CGI_10006503
			CGI_10006504	UBXN7	UBX domain-containing protein 7
			CGI_10006505
			CGI_10006506	UBXN7	UBX domain-containing protein 7
			CGI_10006507	GPR64	G-protein coupled receptor 64
	Marker49357	scaffold1514_29264	CGI_10005307	AT2B3	Plasma membrane calcium-transporting ATPase 3
			CGI_10005308	TLL1	Tolloid-like protein 1
	Marker28887	scaffold42190_79142	CGI_10006336	CC063	Uncharacterized protein C3orf63 homolog
			CGI_10006337	TRUB2	Probable tRNA pseudouridine synthase 2
			CGI_10006338
			CGI_10006339	FACD2	Fanconi anemia group D2 protein
			CGI_10006340	S26A5	Prestin
	Marker34707	scaffold499_125178	CGI_10015762	C1QT4	Complement C1q tumor necrosis factor-related protein 4
			CGI_10015763
			CGI_10015764
			CGI_10015765
	Marker9711	scaffold145_480322	CGI_10026557	FUCTA	Glycoprotein 3-alpha-L-fucosyltransferase A
			CGI_10026558	FUCTA	Glycoprotein 3-alpha-L-fucosyltransferase A
			CGI_10026559
	Marker23499
	Marker38934
	Marker36324
	Marker3102	scaffold1041_287740	CGI_10014677	TTLL3	Tubulin monoglycylase TTLL3
			CGI_10014678
			CGI_10014679
			CGI_10014680
			CGI_10014681
			CGI_10014682
			CGI_10014683
			CGI_10014684
			CGI_10014685
			CGI_10014686
			CGI_10014687
	Marker8801	scaffold1391_186758	CGI_10016933	UNC9	Innexin unc-9
			CGI_10016934	UNC9	Innexin unc-9
			CGI_10016935
			CGI_10016936	UNC9	Innexin unc-9
			CGI_10016937	UNC7	Innexin unc-7
			CGI_10016938
			CGI_10016939	CC048	PP2C-like domain-containing protein C3orf48
			CGI_10016940	EFHB	EF-hand domain-containing family member B
			CGI_10016941	RAB5C	Ras-related protein Rab-5C
			CGI_10016942	OSBL6	Oxysterol-binding protein-related protein 6
	Marker7204	scaffold1286_109598	CGI_10009510	UB2G2	Ubiquitin-conjugating enzyme E2 G2
			CGI_10009511	M313B	Mitogen-activated protein kinase kinase kinase 13-B
			CGI_10009512	Y4629	Uncharacterized protein SCO4629
			CGI_10009513
			CGI_10009514	UBR4	E3 ubiquitin-protein ligase UBR4
			CGI_10009515	CHSC	Chitin synthase C
	Marker28384	scaffold419_1264474	CGI_10028395	KAT3	Kynurenine--oxoglutarate transaminase 3
			CGI_10028396	RBP1	RNA-binding protein 1
			CGI_10028397	HTAI2	Oxidoreductase HTATIP2
			CGI_10028398	FMO5	Dimethylaniline monooxygenase
			CGI_10028400	FMO5	Dimethylaniline monooxygenase
			CGI_10028401	NUP62	Nuclear pore glycoprotein p62
			CGI_10028402
			CGI_10028403	TRIM2	Tripartite motif-containing protein 2
			CGI_10028404
	Marker18099	scaffold209_92848	CGI_10013481	HMCN1	Hemicentin-1
			CGI_10013482	CC059	Uncharacterized protein C3orf59
	Marker31542	scaffold433_643746	CGI_10027082	HMW2	Cytadherence high molecular weight protein 2
			CGI_10027083	HAAF	Hemagglutinin/amebocyte aggregation factor
			CGI_10027084	HAAF	Hemagglutinin/amebocyte aggregation factor
			CGI_10027085	HAAF	Hemagglutinin/amebocyte aggregation factor
			CGI_10027086	HAAF	Hemagglutinin/amebocyte aggregation factor
			CGI_10027087	TREA	Trehalase
			CGI_10027088
	Marker45442	scaffold1014_146477	CGI_10020262	MP20	Muscle-specific protein 20
			CGI_10020263
			CGI_10020264	MRC1	Macrophage mannose receptor 1
			CGI_10020265	FBN1	Fibrillin-1
	Marker44034	scaffold962_920252	CGI_10027668	CCKAR	Cholecystokinin receptor type A
			CGI_10027669
			CGI_10027670
			CGI_10027671	NR2C2	Nuclear receptor subfamily 2 group C member 2
			CGI_10027672
			CGI_10027673	GAPD1	GTPase-activating protein and VPS9 domain-containing protein 1
			CGI_10027674	TRAF2	TNF receptor-associated factor 2
	Marker16167	scaffold1855_138587	CGI_10008868
			CGI_10008869	F102A	Protein FAM102A
			CGI_10008870	BA2D1	BAT2 domain-containing protein 1
			CGI_10008871	PLCA	1-acyl-sn-glycerol-3-phosphate acyltransferase alpha
			CGI_10008872	TRIM3	Tripartite motif-containing protein 3
			CGI_10008873	RECS	Probable ATP-dependent DNA helicase recS
			CGI_10008874	ACSF2	Acyl-CoA synthetase family member 2, mitochondrial
			CGI_10008875	ACSF2	Acyl-CoA synthetase family member 2, mitochondrial
			CGI_10008876	CN16B	Uncharacterized protein C14orf166B
	Marker7678	scaffold1309_43780	CGI_10011551	AOSL	Allene oxide synthase-lipoxygenase protein
			CGI_10011552	LOX5	Arachidonate 5-lipoxygenase
			CGI_10011553	AOSL	Allene oxide synthase-lipoxygenase protein
			CGI_10011554	CYBP	Calcyclin-binding protein
			CGI_10011555	BAT5	Protein BAT5
			CGI_10011556
			CGI_10011557	BCD1	Box C/D snoRNA protein 1
			CGI_10011558	PSB7	Proteasome subunit beta type-7
			CGI_10011559	FA78B	Protein FAM78B
			CGI_10011560	PPAC2	Presqualene diphosphate phosphatase
			CGI_10011561	NEK7	Serine/threonine-protein kinase Nek7
			CGI_10011562	NU214	Nuclear pore complex protein Nup214
			CGI_10011563	TF2B	Transcription initiation factor IIB
	Marker3623	scaffold1083_293786	CGI_10016535
			CGI_10016536	MIOX	Inositol oxygenase
			CGI_10016537	MPP7	MAGUK p55 subfamily member 7
			CGI_10016538
			CGI_10016539	NOP58	Nucleolar protein 58
			CGI_10016540	ANPRA	Atrial natriuretic peptide receptor A
	Marker22024	scaffold351_559602	CGI_10022610
			CGI_10022611	CG064	UPF0712 protein C7orf64 homolog
			CGI_10022612	DCAKD	Dephospho-CoA kinase domain-containing protein
			CGI_10022613
			CGI_10022614	EFCB1	EF-hand calcium-binding domain-containing protein 1
			CGI_10022615	NMT2	Glycylpeptide N-tetradecanoyltransferase 2
			CGI_10022616	SNX13	Sorting nexin-13
	Marker31547	scaffold433_678466	CGI_10027082
			CGI_10027083
			CGI_10027084
			CGI_10027085
			CGI_10027086
			CGI_10027087
			CGI_10027088
			CGI_10027089
	Marker8826	scaffold1391_371150	CGI_10016948	PKHL1	Fibrocystin-L
			CGI_10016949	NFKB1	Nuclear factor NF-kappa-B p105 subunit
	Marker18073	scaffold209_146883	CGI_10013481
			CGI_10013482
			CGI_10013483	PERM	Myeloperoxidase
			CGI_10013484
			CGI_10013485	DDAH1	N(G),N(G)-dimethylarginine dimethylaminohydrolase 1
			CGI_10013486	DDAH1	N(G),N(G)-dimethylarginine dimethylaminohydrolase 1
			CGI_10013487
			CGI_10013488
			CGI_10013489
			CGI_10013490	MOXD1	DBH-like monooxygenase protein 1 homolog
	Marker8825	scaffold1391_370780	CGI_10016948
			CGI_10016949
	Marker43279	scaffold914_160752	CGI_10018872	DMBT1	Deleted in malignant brain tumors 1 protein
			CGI_10018873	APLC	Aplycalcin
			CGI_10018874	NKRF	NF-kappa-B-repressing factor
			CGI_10018875
			CGI_10018876	ACT	Actin, adductor muscle
			CGI_10018877
			CGI_10018878	DNA2	Plancitoxin-1
			CGI_10018879	DNS2B	Deoxyribonuclease-2-beta
			CGI_10018880	DNA2	Plancitoxin-1
	Marker41985	scaffold82_381447	CGI_10025258	GCYA2	Guanylate cyclase soluble subunit alpha-2
			CGI_10025259	DS	Protein dachsous
			CGI_10025260	DS	Protein dachsous
			CGI_10025261	DUR31	Probable urea active transporter 1
			CGI_10025263
	Marker5355	scaffold1179_998958	CGI_10027394	MCM9	DNA replication licensing factor MCM9
			CGI_10027395	GRP78	78 kDa glucose-regulated protein
			CGI_10027396	RERG	Ras-related and estrogen-regulated growth inhibitor
			CGI_10027397
			CGI_10027398

## Sheet: Table S4
Table S4	Genotype and allele frequencies of these six SNPs
SNP ID	Genotype	Frequency	Allele	Frequency
Marker13973	CC	0.957	C	0.979
	CG	0.043	G	0.021
Marker20478	AA	0.074	A	0.362
	AG	0.574	G	0.638
	GG	0.351
Marker28123	CT	0.543	C	0.271
	TT	0.457	T	0.729
Marker35461	CC	0.185	C	0.592
	CG	0.815	G	0.408
Marker14346-85	CC	0.447	C	0.723
	CT	0.553	T	0.277
Marker14346-48	CT	0.553	C	0.277
	TT	447	T	0.723

## Sheet: Table S5
Table S5	The association between SNPs and the gene expression level
eQTL region	Gene-SNP	Genotype	Count	Mean value	P-value
eqtl_HSPA13_6-1	HSPA13-Marker28123	CT	51	0.5541	0.3444
		TT	43	0.4559
eqtl_HSPA9_7	HSPA9-Marker13973	CC	80	1.066	0.0395
		CG	4	1.473
eqtl_HSPA4_7	HSPA4-Marker13973	CC	51	0.973	0.9784
		CG	4	0.9874
eqtl_HSPB1_7	HSPB1-Marker13973	CC	79	1.305	0.0716
		CG	4	2.357
eqtl_BRKS2_8	BRKS2-Marker35461	CG	65	0.8832	0.8097
		CC	16	0.8051
eqtl_ATG7_5	ATG7-Marker14346-85	CC	34	0.4478	<0.0001
		CT	44	1.31
	ATG7-Marker14346-48	TT	35	0.4374	<0.0001
		TC	43	1.338
eqtl_CLCN2_8	CLCN2-Marker20478	GG	33	0.5748	0.3143
		GA	53	0.5376
		AA	7	0.3931

## Sheet: Table S6
Table S6	Haplotype association analysis
Haplotype	Total count	Beta	SE	R2	T	P
CT	69	-0.446	0.085	0.265	-5.238	0.00014
CC	43	0.9	0.168	0.274	5.36	8.62e-07
TT	44	0.861	0.171	0.249	5.028	3.2e-06
