# Supplementary figures and images for: Identification of Distant Regulatory Elements Using Expression Quantitative Trait Loci Mapping for Heat-Responsive Genes in Oysters
Source: MDPI journal article supplement (doi:10.3390/genes12071040), 2021-07-05

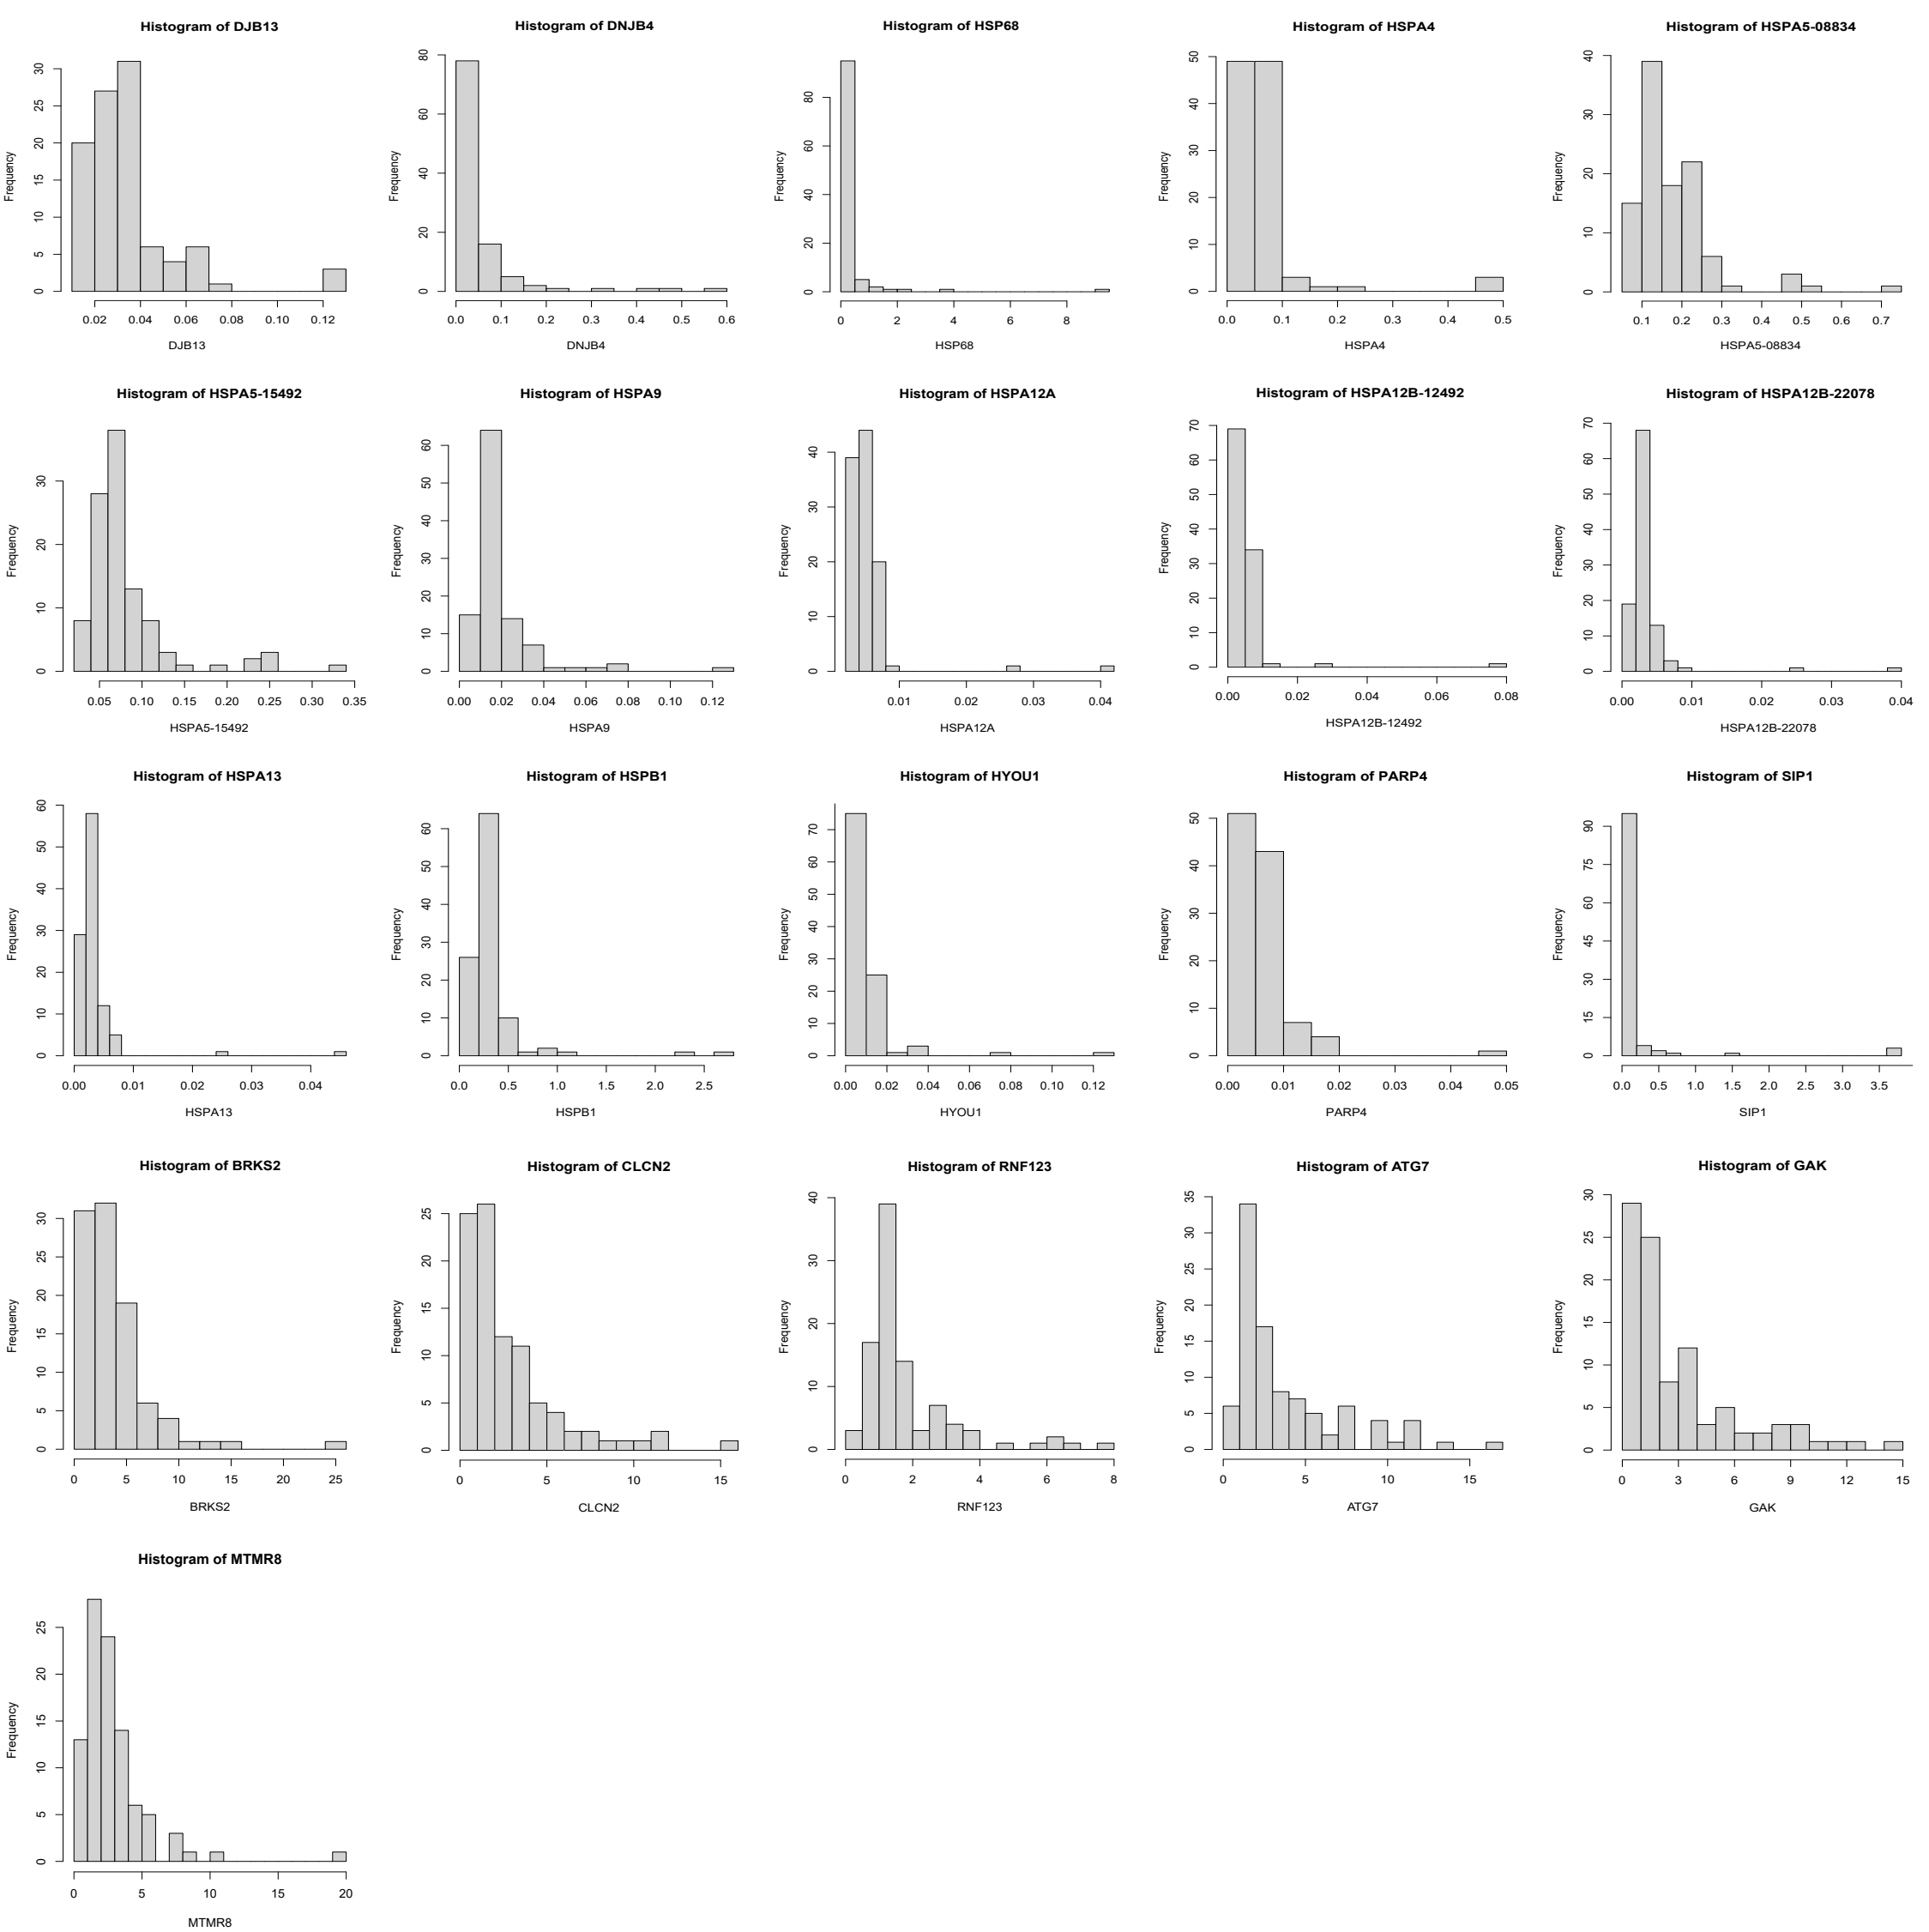

Supplement: s1 [file s1]

**Figure S2.** Plots of eQTL mapping of 21 heat-responsive genes

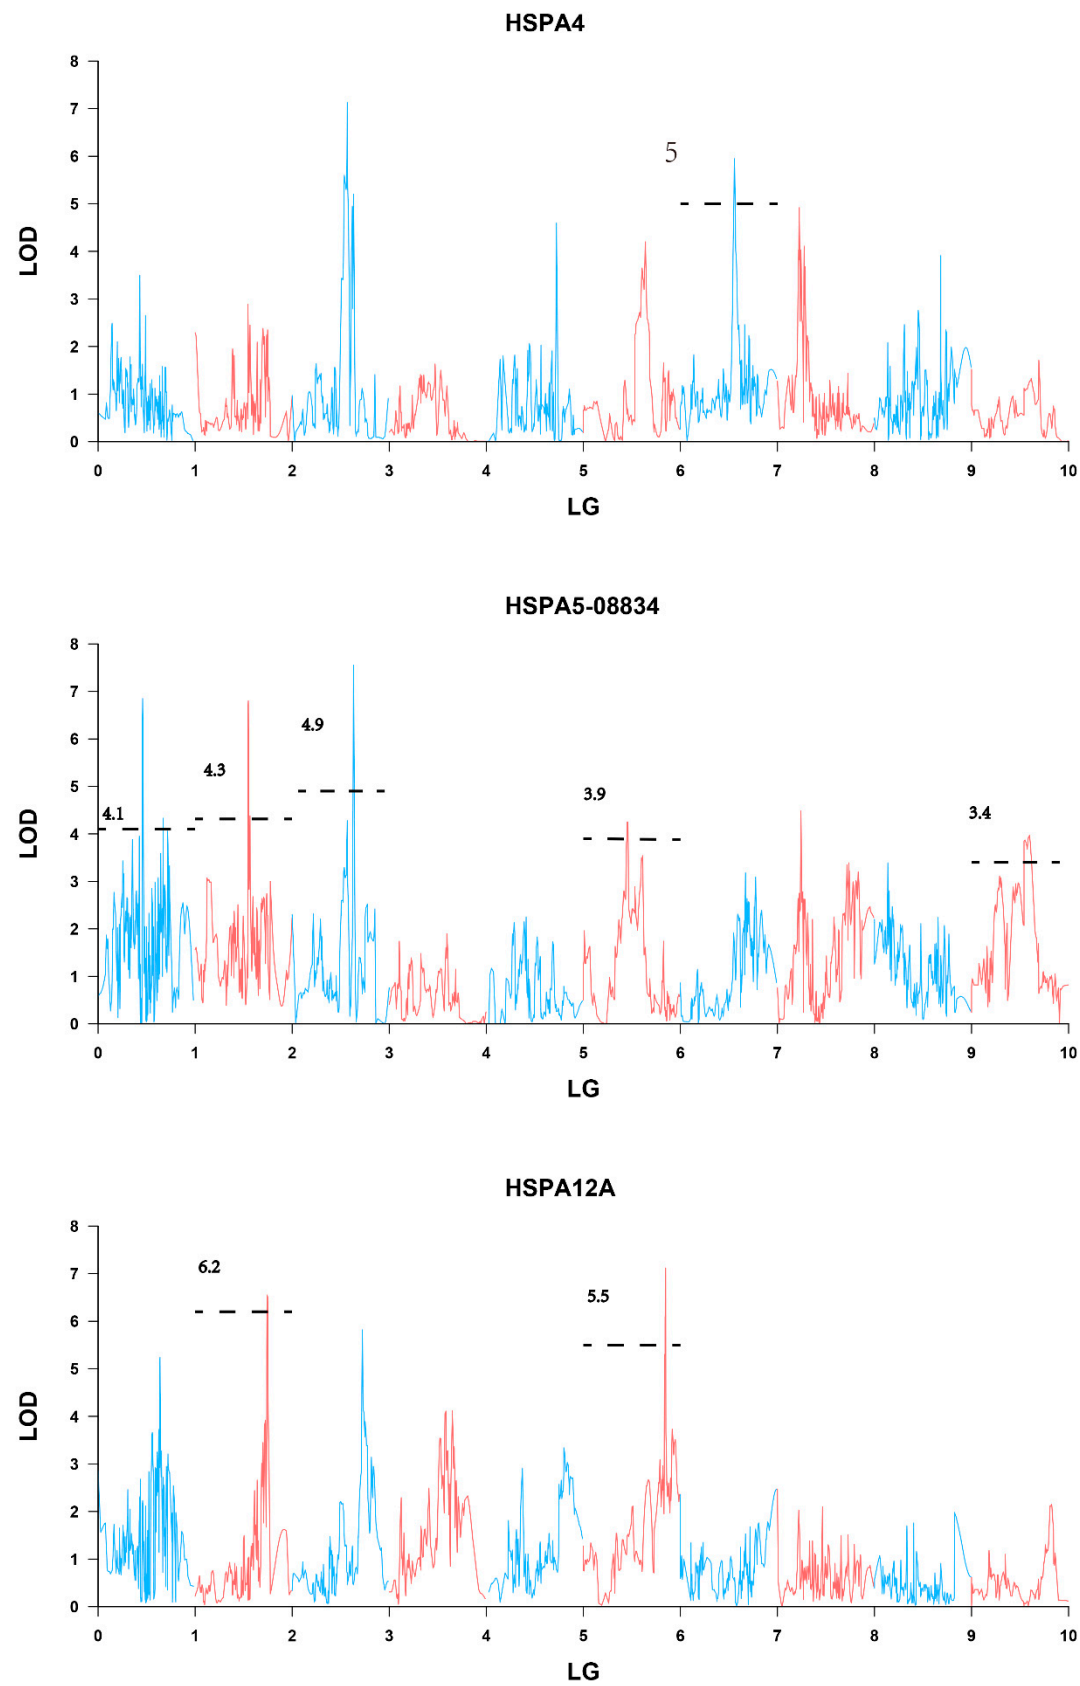

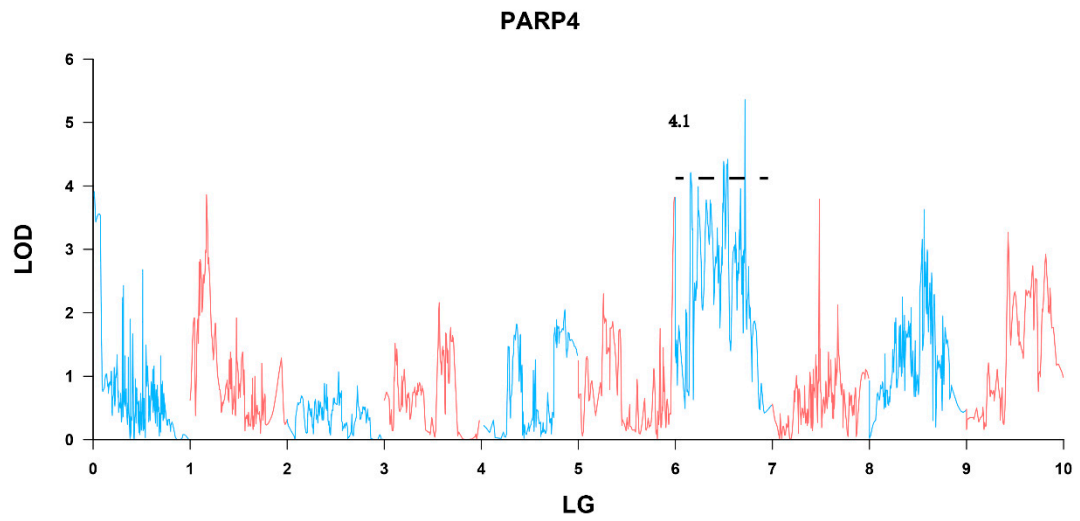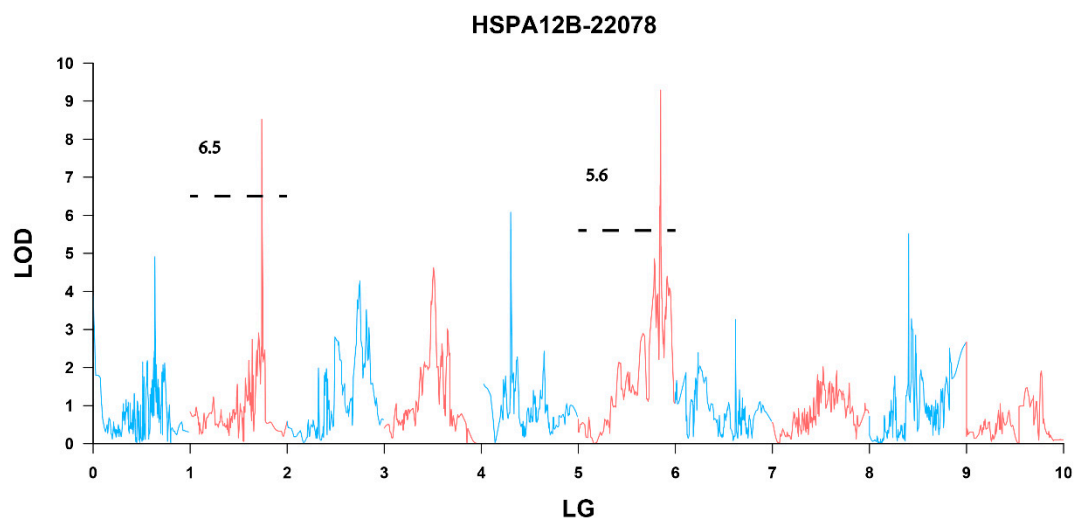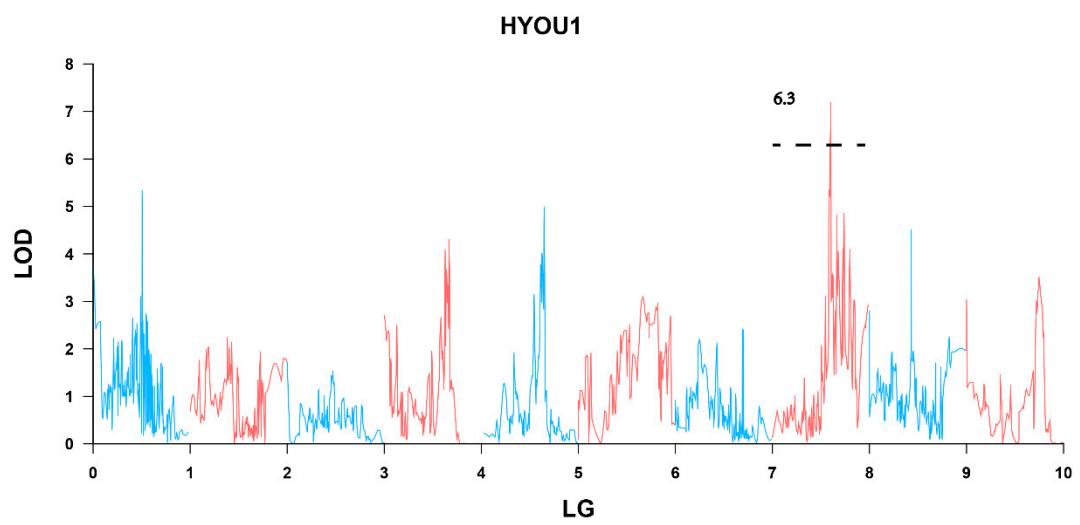

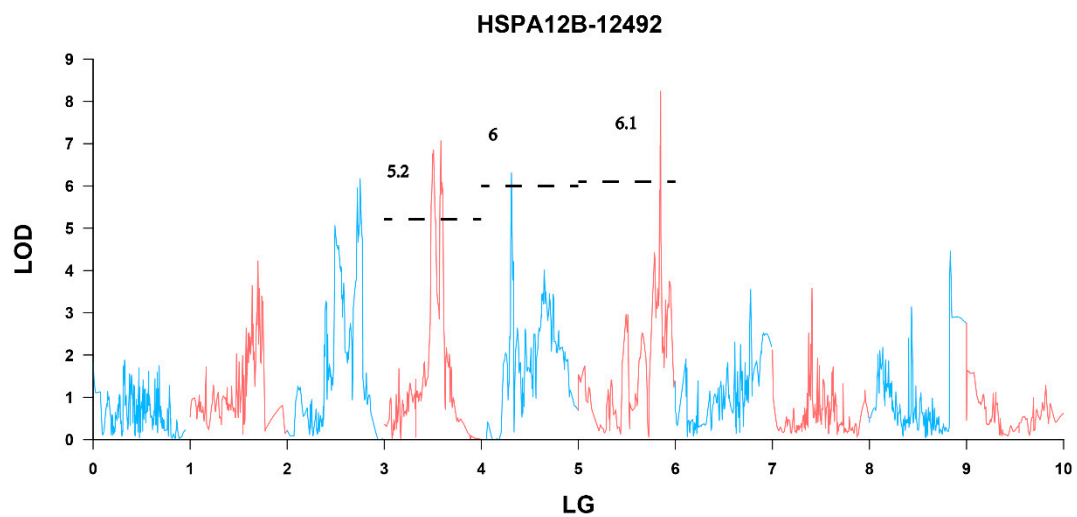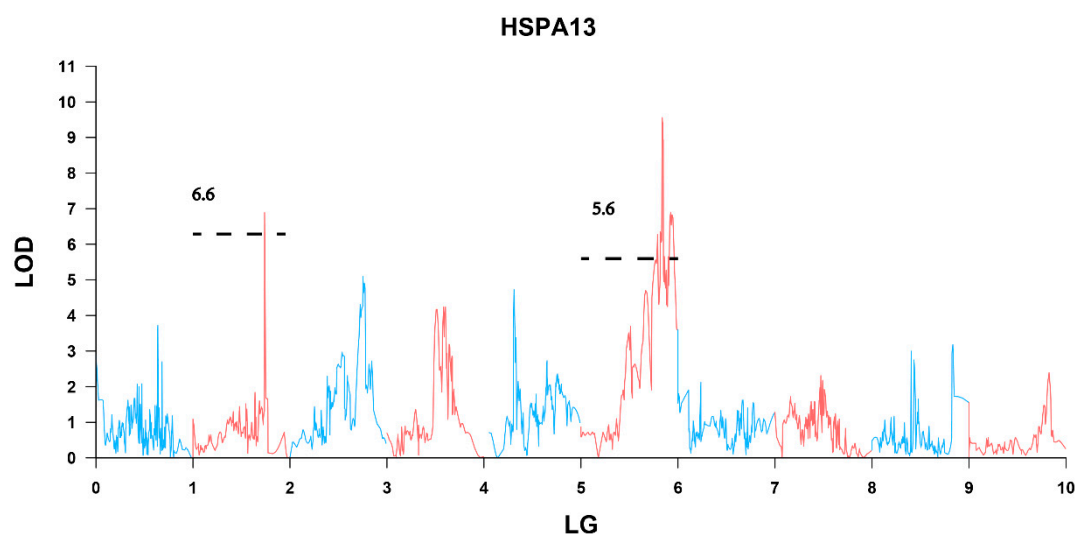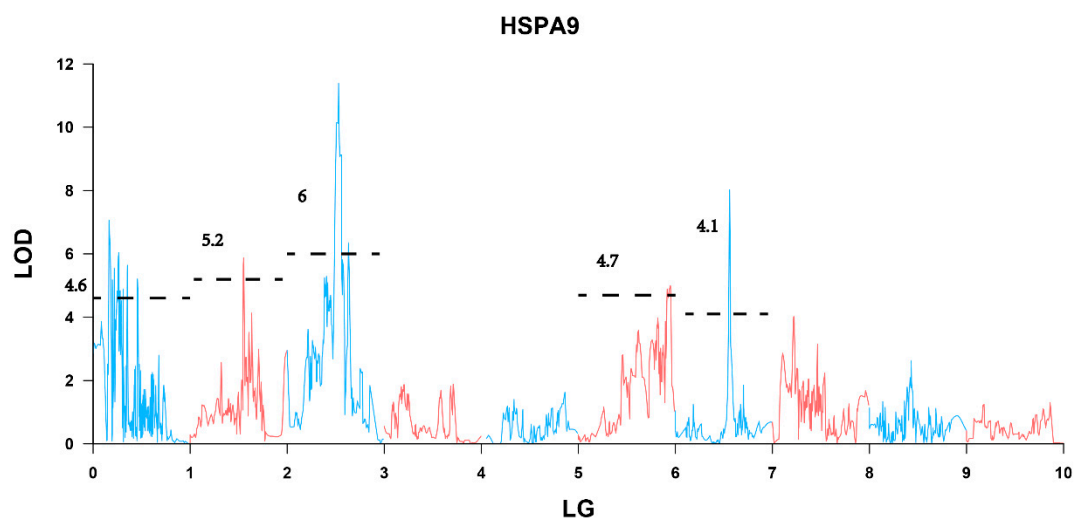

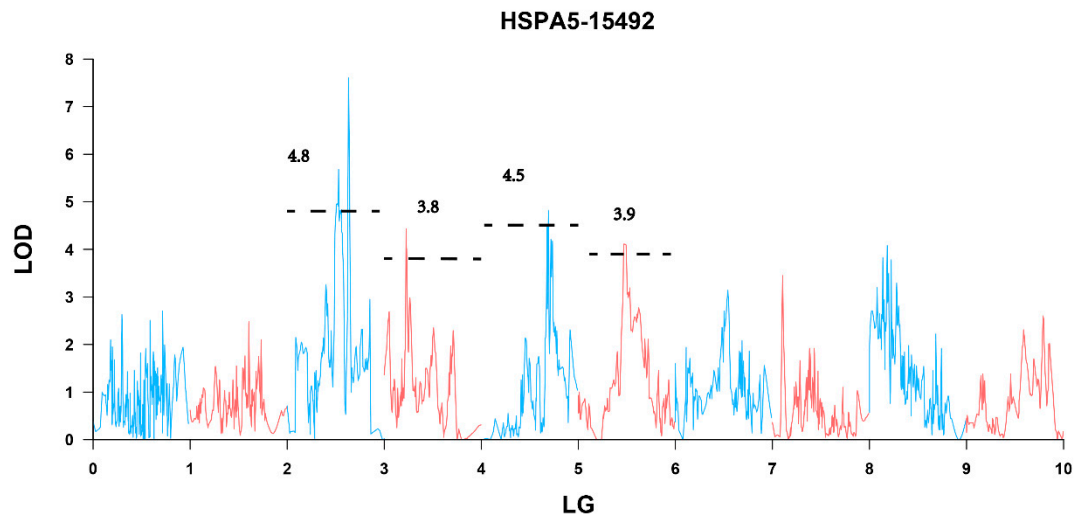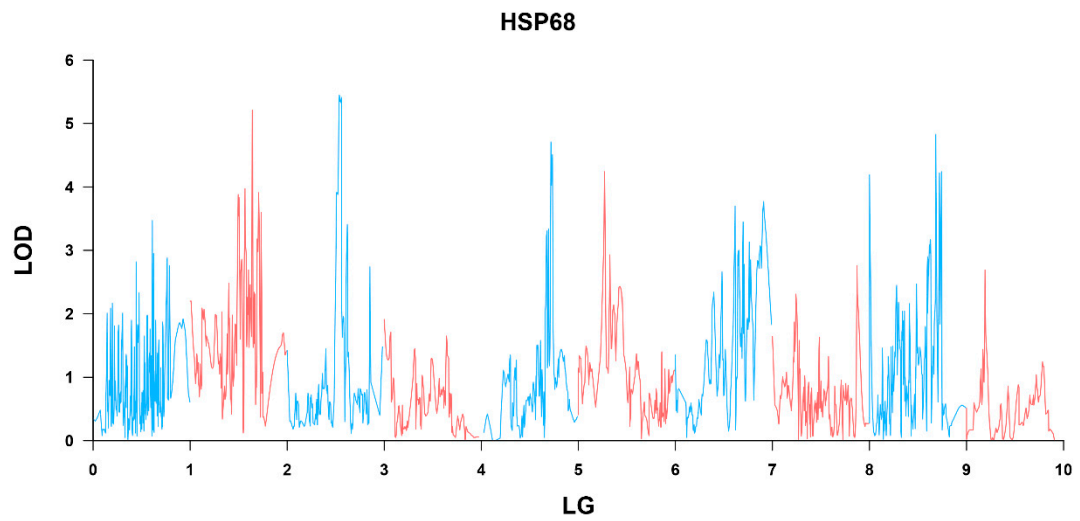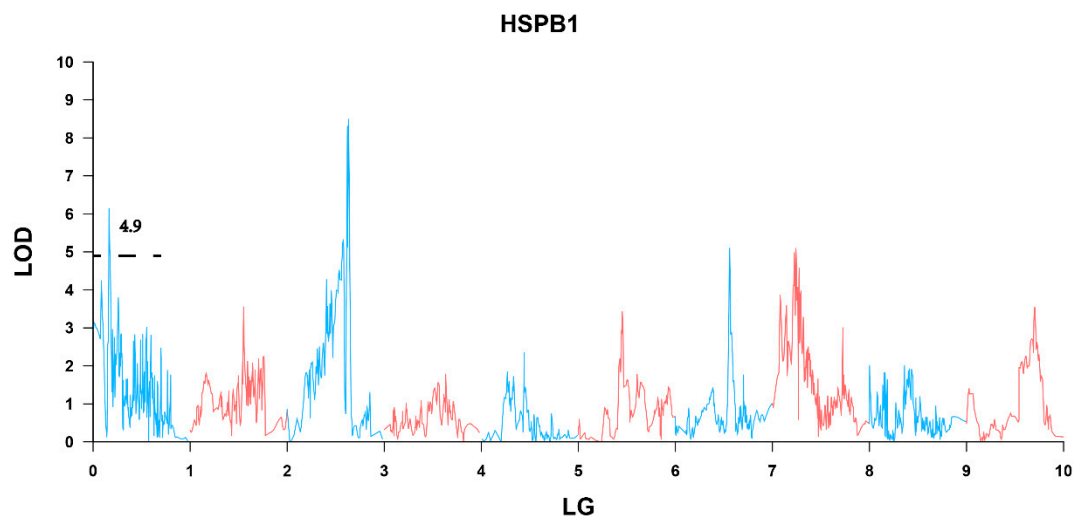

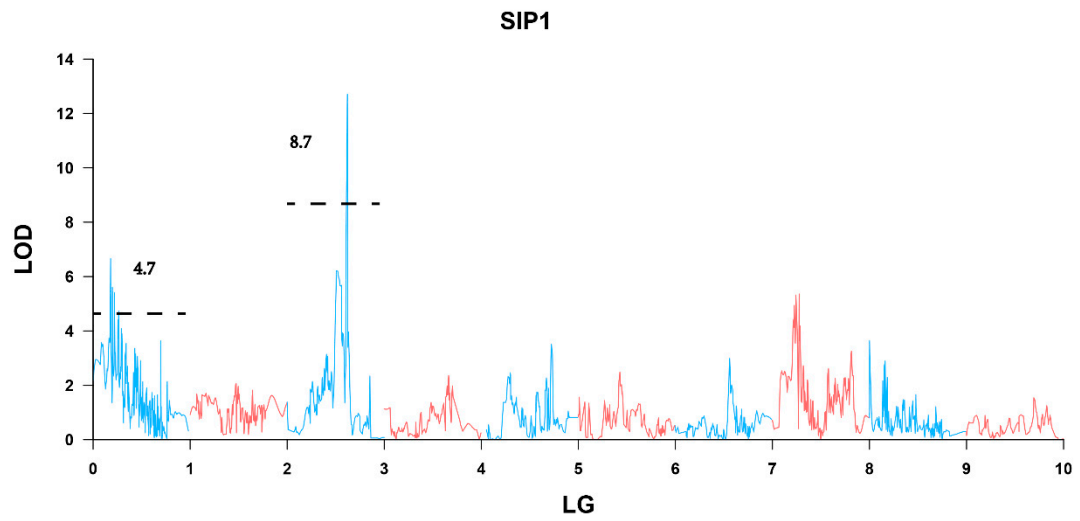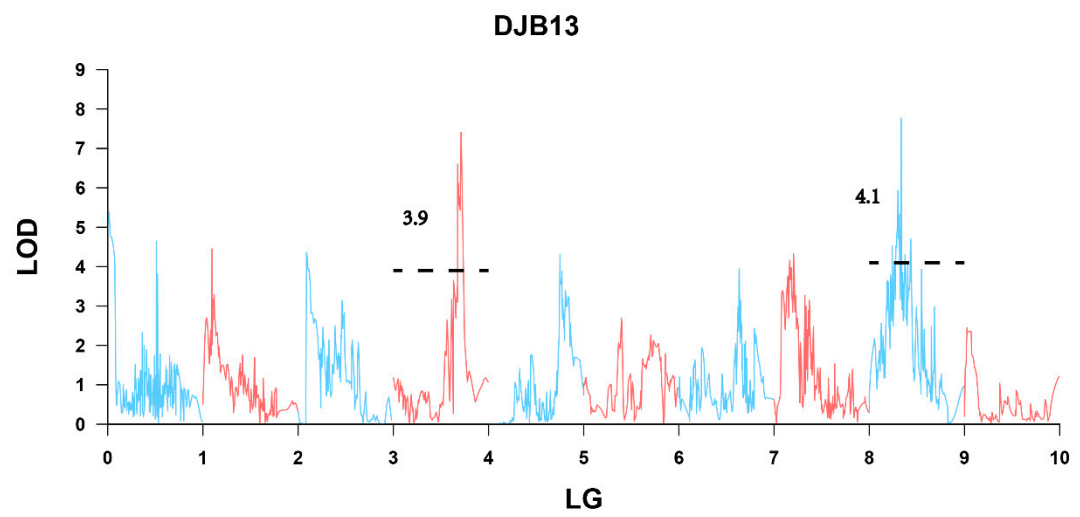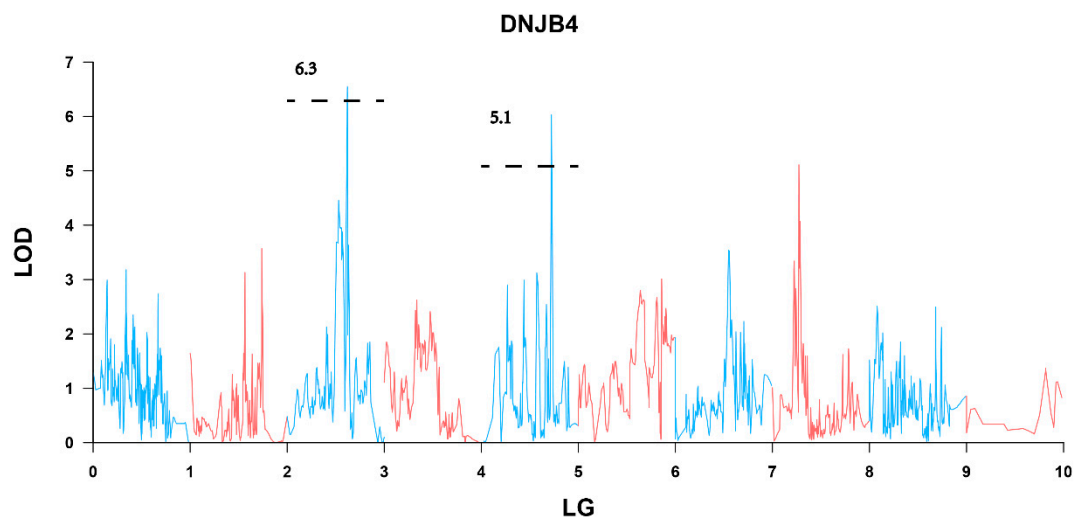

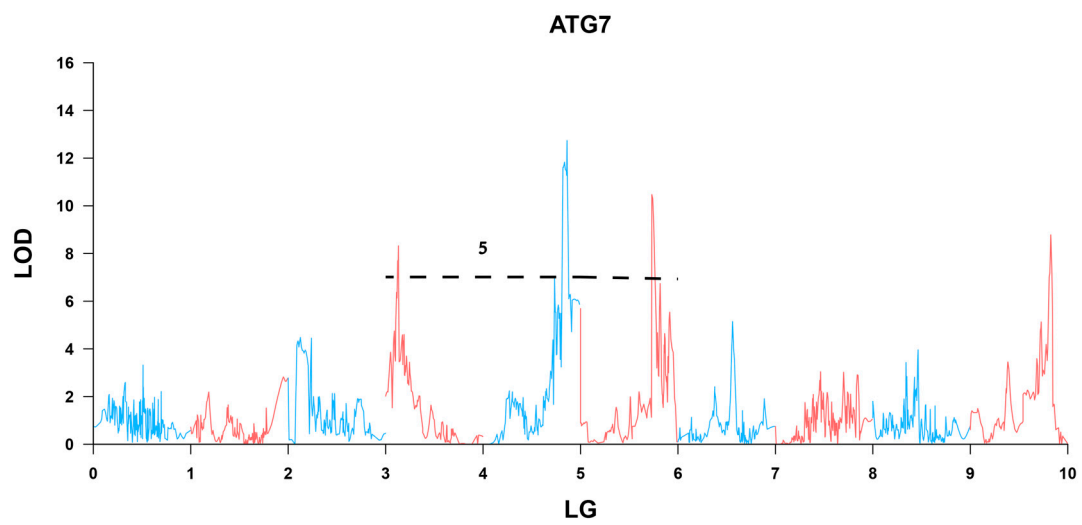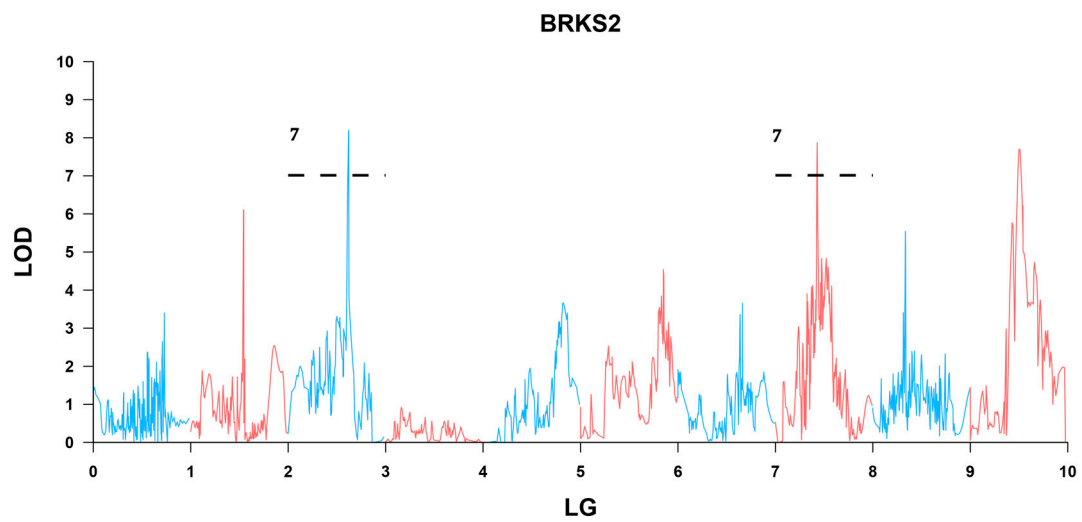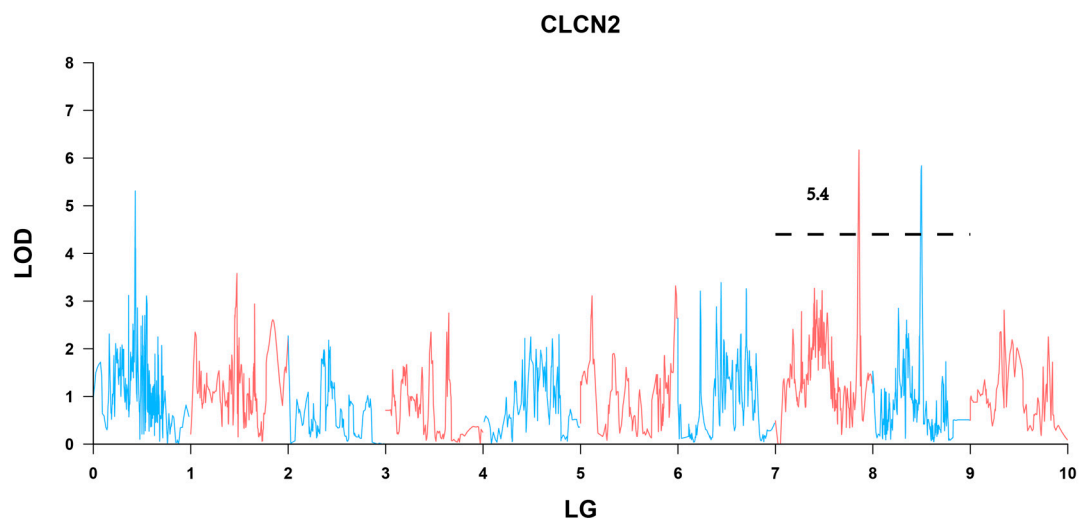

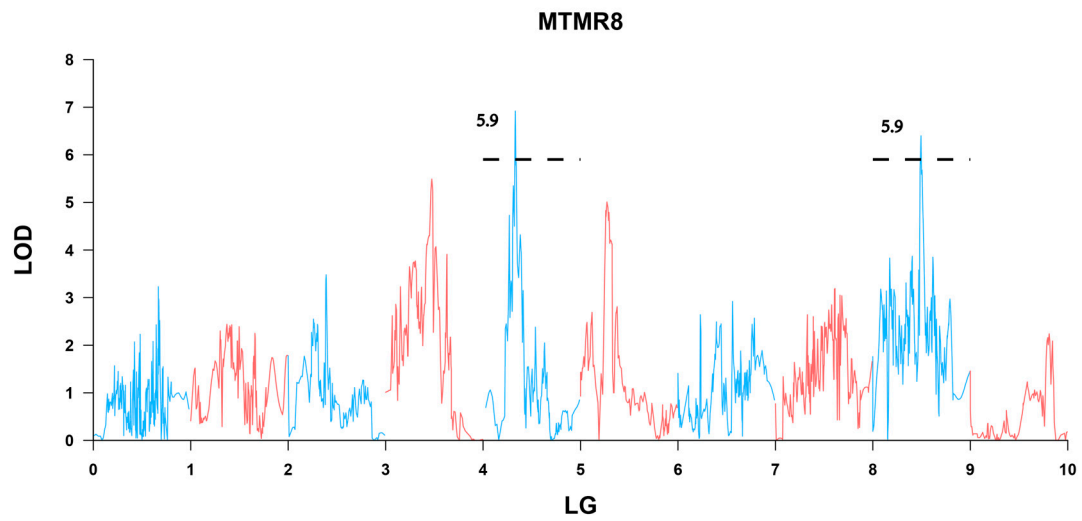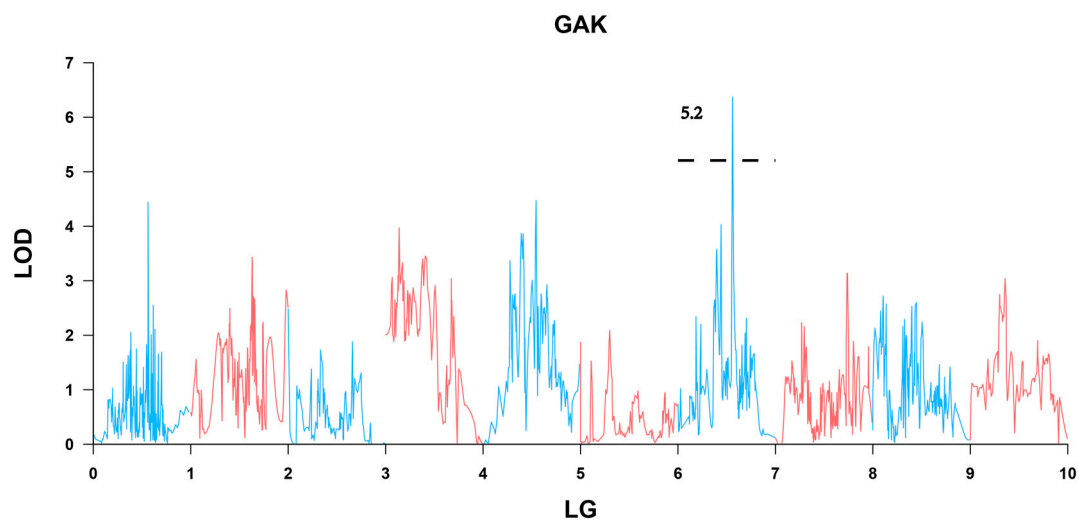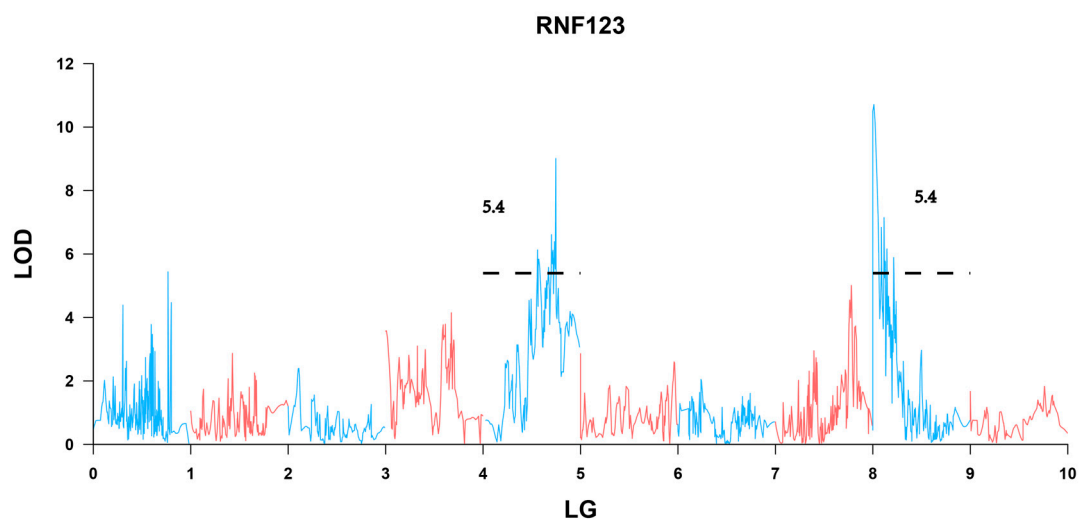

Supplement: s1 [file s1]

## The Most enriched GO Terms

GO term

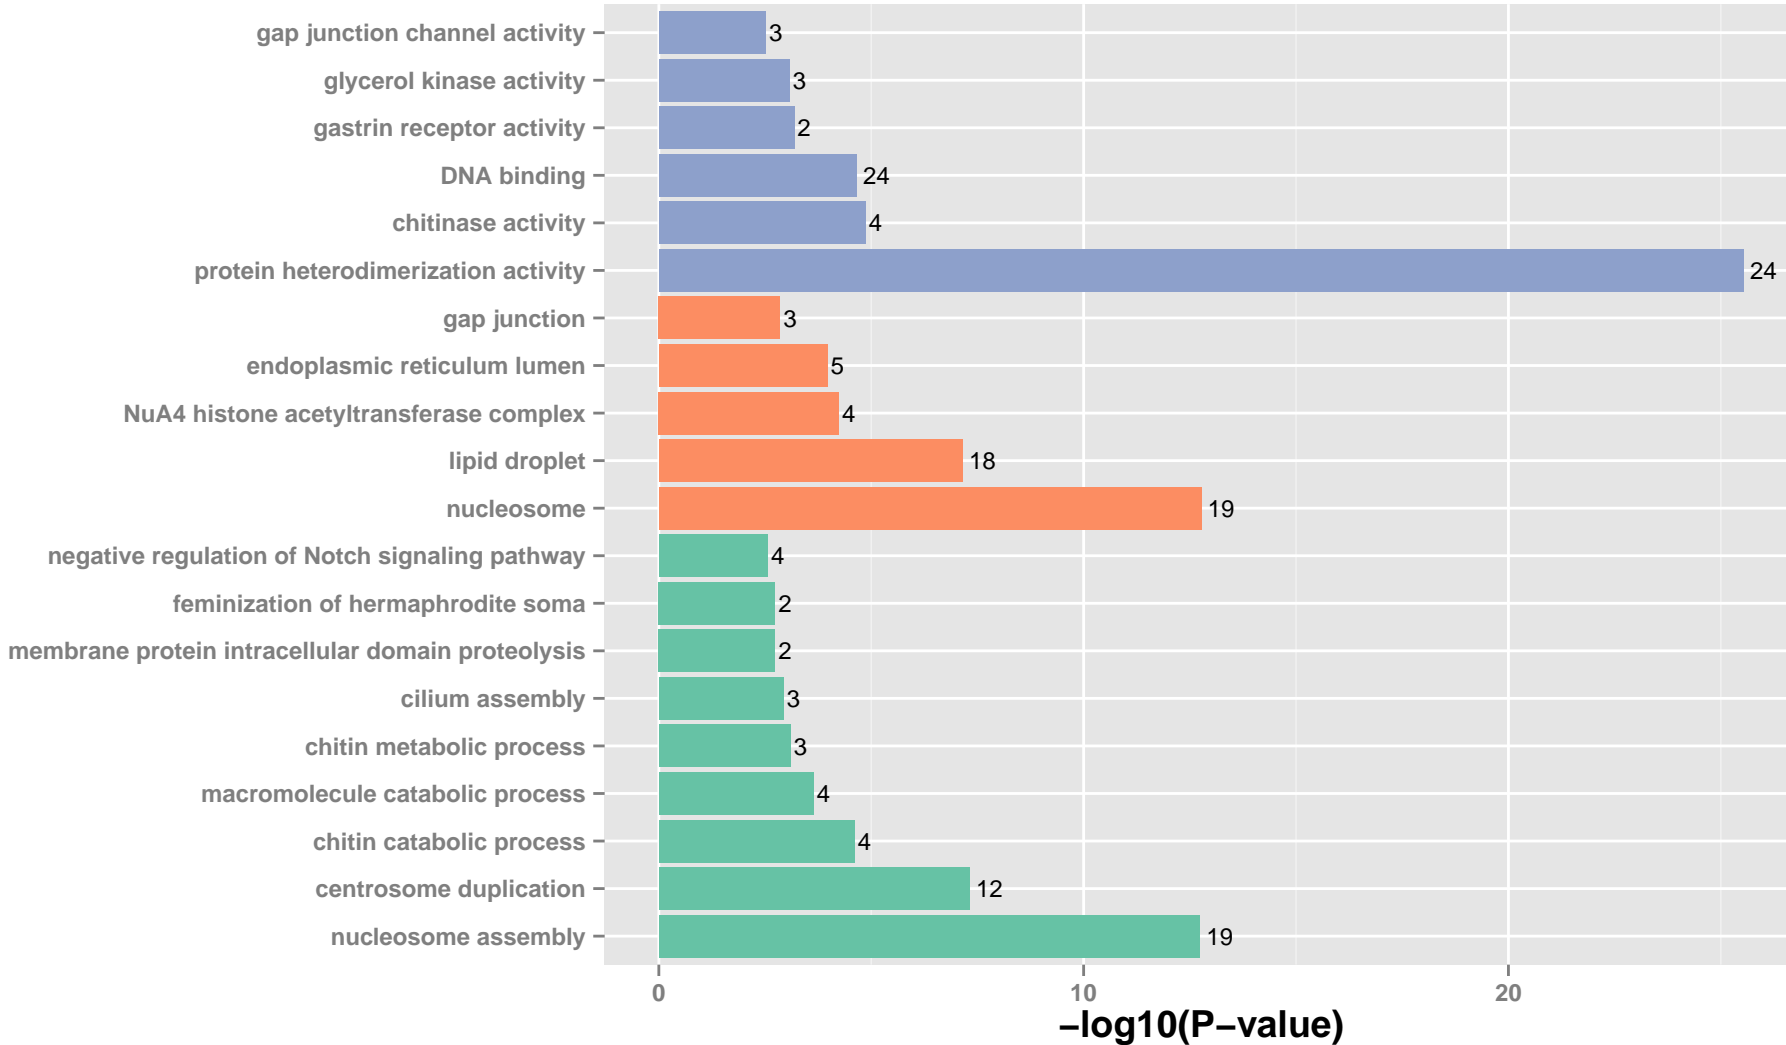

Biological Process  
Cellular Component  
Molecular Function

Supplement: s1 [file s1]
